# Supplementary material for: System for δ 13 C-CO 2 and x CO 2 analysis of discrete gas samples by cavity ring-down spectroscopy
Source: Copernicus journal article supplement (doi:10.5194/amt-2017-57), 2017-04-20
Supplement: Supplementary file 1 [file FigS1.pdf › Supplements_Dickinson _et_al/FigS1.pdf]

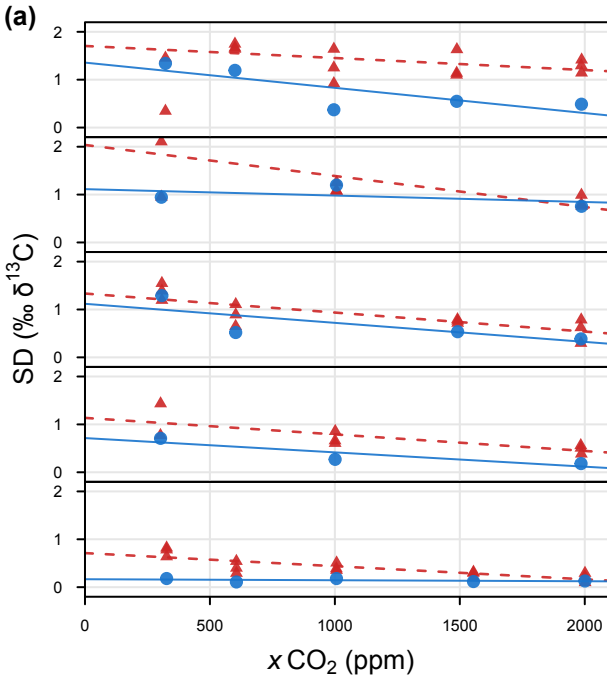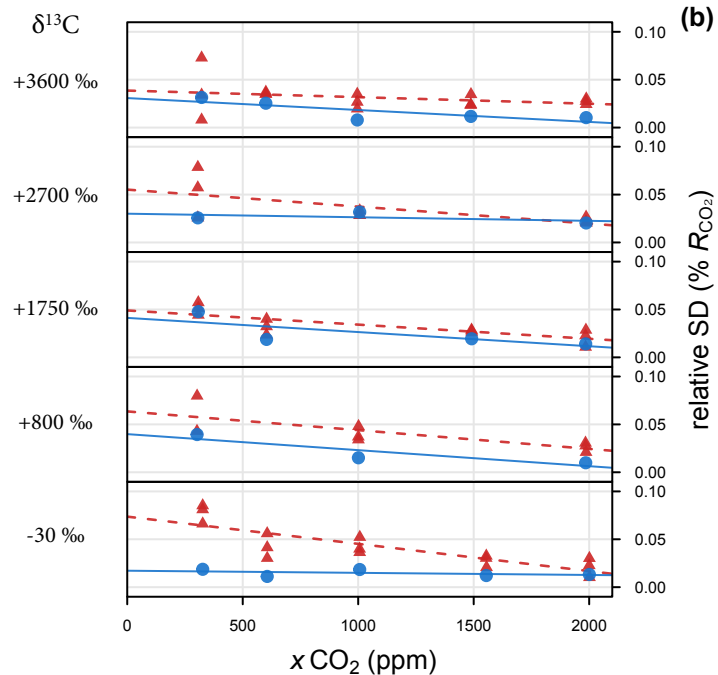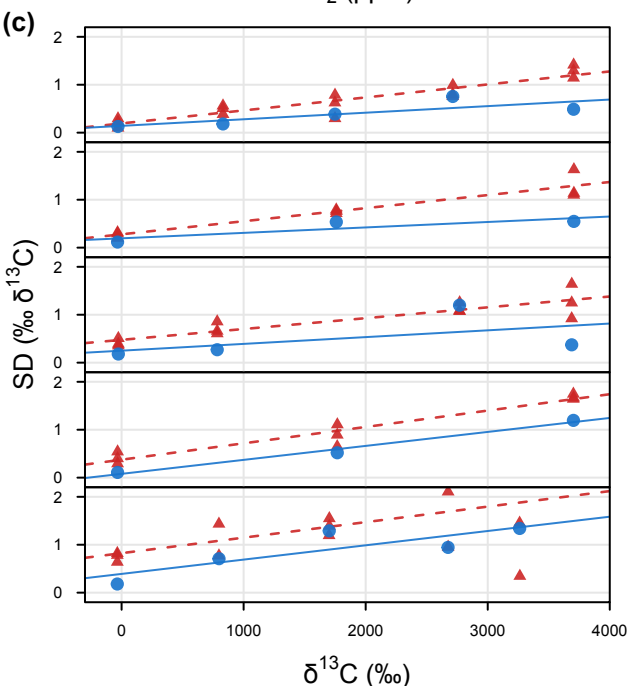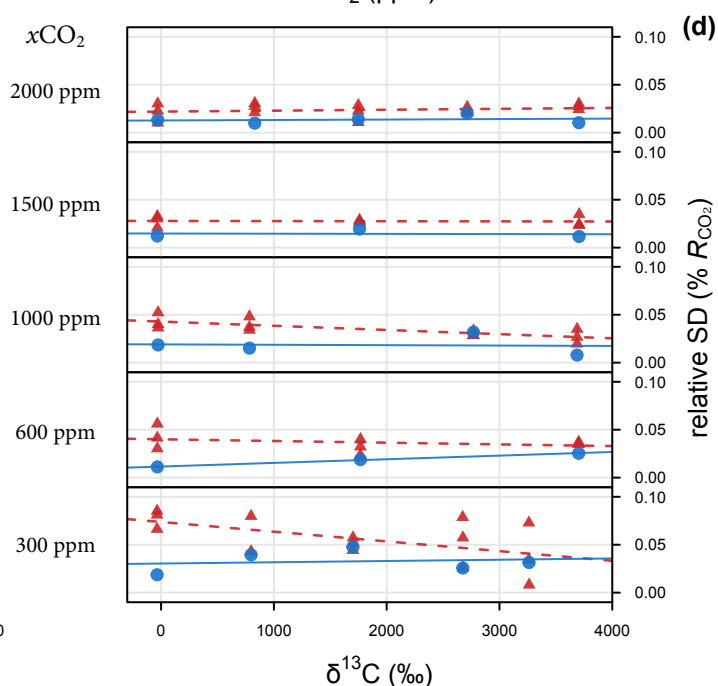

● standard deviation of replicate measurements

— linear trendline

▲ standard deviation of individual measure

- - - linear trendline
