# Supplementary material for: System for δ 13 C-CO 2 and x CO 2 analysis of discrete gas samples by cavity ring-down spectroscopy
Source: Copernicus journal article supplement (doi:10.5194/amt-2017-57), 2017-04-20
Supplement: Supplementary file 1 [file Measurement_data.xlsx]

## Sheet: Bottle measures
Aggregated direct bottle measurements of standard gases (data calibrated as per Dickinson et al. 2017). Means for 10 minutes of measurement data, Standard deviations, Allan deviations (30 s period)
Mean
Bottle code	12CO2_dry	13CO2_dry	12CO2	13CO2	TotCO2_dry	TotCO2	Delta_Raw	Ratio_Raw	H2O	CH4	CH4_High_Precision	peak_75	ch4_splinemax_for_correct	peak87_baseave_spec	peak88_baseave
NA1	490.55	5.28624	490.425	5.2849	495.836	495.71	-36.1386	0.0107762	0.0180305	-0.000124791	0.00467447	1.79945	0.1391	294.137	8.38413
NA2	1024.26	11.1373	1024.11	11.1357	1035.39	1035.25	-27.4304	0.0108735	0.00990385	1.48062	1.57737	0.988408	320.131	613.522	17.6615
ZERO	0.0464891	0.00357152	0.0464799	0.00357082	0.0500606	0.0500508	5871.51	0.0768249	0.0139642	-0.0016759	0.00916806	1.39363	-0.216797	0.6665	0.0140298
ZEROsorb	-1.14184	-0.0178781	-1.10118	-0.0172416	-1.15972	-1.11842	400.451	0.0156573	2.40006	-1.39101	-0.0244356	239.527	-298.426	-0.0199331	0.00779109
HE1	2028.98	25.5278	2028.61	25.5231	2054.51	2054.13	125.346	0.0125816	0.0131592	0.368755	0.397676	1.31329	80.3941	1214.48	40.4591
HE2	2009.15	100.113	2008.68	100.09	2109.26	2108.77	3456.87	0.0498287	0.0165729	1.16456	1.1714	1.65398	252.733	1199.35	158.633
LE1	402.244	25.2495	402.114	25.2413	427.494	427.355	4614.52	0.0627715	0.0229548	1.17686	1.15959	2.2909	255.126	240.436	40.0144
LE2	398.214	101.237	398.138	101.218	499.452	499.356	21739.1	0.254228	0.0135779	2.35598	2.40231	1.35508	509.523	237.063	160.423
TT	1002.18	50.2157	1001.98	50.2058	1052.4	1052.19	3481.71	0.0501065	0.0139791	1.17951	1.16716	1.39512	255.779	598.577	79.5773
Std. Dev.
Bottle code	12CO2_dry	13CO2_dry	12CO2	13CO2	TotCO2_dry	TotCO2	Delta_Raw	Ratio_Raw	H2O	CH4	CH4_High_Precision	peak_75	ch4_splinemax_for_correct	peak87_baseave_spec	peak88_baseave
NA1	0.129085	0.00410078	0.128748	0.00410037	0.129073	0.128733	0.56818	6.35237e-06	0.000464768	0.00939217	0.000491004	0.046384	2.10571	0.0773285	0.00642206
NA2	0.212724	0.00381026	0.213768	0.0038241	0.213274	0.21435	0.284694	3.18293e-06	0.000509122	0.00709507	0.000254345	0.0508105	1.53995	0.128393	0.00598825
ZERO	0.0393005	0.00394342	0.0392925	0.00394264	0.0396638	0.0396557	215.867	0.00241344	0.000402001	0.00886939	0.000504965	0.0401198	1.99232	0.0235999	0.00617935
ZEROsorb	0.0637286	0.00383709	0.0614595	0.00370047	0.0641302	0.0618468	174615	1.95223	0.00193059	0.0780032	0.00103576	0.192673	16.9664	0.0369139	0.00578785
HE1	0.466137	0.00651187	0.465656	0.00641777	0.46706	0.466472	0.336151	3.75824e-06	0.000530626	0.0172241	0.000457542	0.0529567	3.74277	0.279683	0.0100938
HE2	0.527157	0.015201	0.529229	0.0153738	0.532184	0.534448	1.10799	1.23876e-05	0.000532609	0.0167416	0.00018598	0.0531545	3.66603	0.317866	0.0240695
LE1	0.106789	0.00519493	0.106421	0.00523098	0.107603	0.107247	1.65477	1.85006e-05	0.000666552	0.0111848	0.0002012	0.0665222	2.44816	0.0639189	0.00819502
LE2	0.157519	0.0141573	0.158196	0.0141401	0.159683	0.160524	9.26259	0.000103558	0.000524163	0.00672342	0.0002689	0.0523117	1.45749	0.0950158	0.0221602
TT	0.218447	0.00779727	0.218809	0.00783152	0.218965	0.219373	1.09732	1.22682e-05	0.000409253	0.0126971	0.000175221	0.0408436	2.7788	0.131421	0.0122647
Allan Dev.
Bottle code	12CO2_dry	13CO2_dry	12CO2	13CO2	TotCO2_dry	TotCO2	Delta_Raw	Ratio_Raw	H2O	CH4	CH4_High_Precision	peak_75	ch4_splinemax_for_correct	peak87_baseave_spec	peak88_baseave
NA1	0.0226321	0.000750909	0.0230017	0.000754046	0.0229636	0.0233417	0.126238	1.41136e-06	0.000251845	0.00425624	0.00027037	0.0251342	0.953717	0.0138153	0.00117271
NA2	0.0512297	0.000872654	0.0522108	0.000870034	0.051508	0.0524908	0.0609534	6.81471e-07	0.00023667	0.00337507	0.000153228	0.0236197	0.725568	0.0313589	0.00136372
ZERO	0.00975802	0.000790993	0.00975564	0.000790833	0.00963456	0.00963218	64.6315	0.000722593	0.000170822	0.00426261	0.000262677	0.0170481	0.933474	0.00585945	0.00124305
ZEROsorb	0.0176784	0.00120276	0.0170491	0.00115986	0.0176444	0.0170164	44368.8	0.496052	0.00125907	0.0306953	0.000394754	0.125656	6.70102	0.01024	0.00182619
HE1	0.0957963	0.00160617	0.0940247	0.00157418	0.0964183	0.0945933	0.0693366	7.75198e-07	0.000171024	0.00936879	0.000329349	0.0170682	2.00972	0.0564733	0.00246921
HE2	0.125309	0.00672483	0.124475	0.00659724	0.130025	0.129046	0.249595	2.79052e-06	0.000267728	0.00731989	0.000117503	0.0267193	1.59761	0.0747625	0.0103344
LE1	0.0310562	0.00197467	0.0310617	0.00201165	0.0313144	0.0313605	0.588385	6.57826e-06	0.000205172	0.00563924	0.00016182	0.0204763	1.23841	0.0186563	0.00314829
LE2	0.0342093	0.00792261	0.0338326	0.00786223	0.0360437	0.0355305	2.36802	2.64749e-05	0.000244368	0.00421826	0.000157364	0.024388	0.916419	0.0203206	0.0123213
TT	0.0609673	0.00265785	0.0610026	0.00270181	0.0622536	0.0623295	0.244438	2.73287e-06	0.000211284	0.00607061	0.000100616	0.0210862	1.32888	0.0366395	0.00422464

## Sheet: Syringe measures
Syringe sample measurements of standard gases (data calibrated as per Dickinson et al. 2017)
Sample Code	Vessel Code	Measurement Code	12CO2 Dry Baseline	13CO2 Dry Baseline	12CO2 Baseline	13CO2 Baseline	Delta Baseline	Ratio Baseline	H2O Baseline	CH4 Baseline	CH4 HP Baseline	Time triggered	Time de-triggered	Time elapsed (seconds)	Data elapsed	Measurement interval (datapoints)	Mean 12CO2 Dry	Std 12CO2 Dry	Mean 13CO2 Dry	Std 13CO2 Dry	Mean 12CO2	Std 12CO2	Mean 13CO2	Std 13CO2	Mean Delta	Std Delta	Mean Ratio	Std Ratio	Mean H2O	Std H2O	Mean CH4	Std CH4	Mean CH4 HP	Std CH4 HP	Mean CO2 Dry	Std CO2 dry	Mean CO2	Std CO2
ZERO	Syringe1	#N/A	489.845	5.27034	489.333	5.26483	-37.6563	0.0107592	0.074	-0.075	0.013	42236.7	42236.7	204	156	60	1.89549	0.162	0.0234607	0.00354	1.89444	0.162	0.0234477	0.00354	107.058	60.6848	0.0123771	0.000678468	0.042	0.002	-0.039	0.009	0.009	0	1.91895	0.16554	1.9179	0.16554
ZERO	Syringe1	#N/A	489.444	5.26568	488.928	5.26014	-37.7183	0.0107585	0.075	-0.081	0.013	42236.7	42236.7	171	132	36	1.55915	0.206	0.0195093	0.00469	1.5582	0.206	0.0194974	0.00468	119.191	80.8648	0.0125128	0.000904085	0.033	0.001	-0.03	0.009	0.009	0	1.57866	0.21069	1.57771	0.21069
ZEROsorb	Syringe1	#N/A	489.467	5.26452	488.958	5.25905	-37.9763	0.0107556	0.074	-0.054	0.014	42236.7	42236.7	168.5	130	34	0.602841	0.159	0.00244078	0.00405	0.581087	0.154	0.0023527	0.0039	-637.86	107.9	0.00404879	0.00120634	2.463	0.005	-0.64	0.034	-0.002	0.001	0.605282	0.16305	0.583528	0.15805
ZEROsorb	Syringe1	#N/A	489.363	5.26679	488.759	5.26029	-37.3567	0.0107625	0.087	-0.031	0.014	42236.7	42236.7	168.9	131	34	0.534749	0.163	0.00552218	0.00456	0.515185	0.157	0.00532015	0.00439	-76.3418	151.42	0.0103267	0.00169291	2.476	0.004	-0.514	0.034	0.002	0.001	0.540271	0.16756	0.520707	0.16156
HE1	Syringe1	#N/A	490.06	5.27372	489.562	5.26836	-37.46	0.0107614	0.072	-0.019	0.015	42236.8	42236.8	180.5	138	43	2024.14	0.696	25.417	0.00553	2023.3	0.692	25.4064	0.00567	123.137	0.371997	0.0125569	4.159e-06	0.03	0.001	0.352	0.014	0.398	0.001	2049.56	0.70153	2048.72	0.69753
HE1	Syringe1	#N/A	490.335	5.28033	489.838	5.27498	-36.7947	0.0107688	0.072	-0.016	0.015	42236.8	42236.9	163.9	126	30	2023.3	0.568	25.4066	0.00601	2022.41	0.567	25.3955	0.00619	123.148	0.228261	0.012557	2.552e-06	0.031	0.002	0.352	0.015	0.398	0	2048.71	0.57401	2047.82	0.57301
HE1	Syringe1	#N/A	490.349	5.27852	489.854	5.27319	-37.1526	0.0107648	0.071	-0.006	0.015	42236.9	42236.9	166	128	31	2023.08	0.78	25.4043	0.0067	2022.41	0.801	25.3959	0.0069	123.165	0.309476	0.0125572	3.46e-06	0.023	0.001	0.353	0.009	0.398	0	2048.49	0.7867	2047.82	0.8077
LE1	Syringe1	#N/A	490.599	5.28291	490.304	5.27973	-36.8432	0.0107683	0.043	-0.014	0.01	42236.9	42236.9	158.4	122	25	403.606	0.129	25.2212	0.00402	403.435	0.127	25.2105	0.00408	4589.31	2.13395	0.0624897	2.3858e-05	0.03	0.001	1.09	0.003	1.159	0.001	428.827	0.13302	428.656	0.13102
LE1	Syringe1	#N/A	490.432	5.28456	490.131	5.28133	-36.2132	0.0107753	0.043	-0.008	0.011	42236.9	42236.9	166.9	129	33	403.224	0.109	25.1939	0.00548	403.093	0.107	25.1857	0.00573	4588.55	2.04531	0.0624811	2.2867e-05	0.023	0.001	1.088	0.004	1.159	0.001	428.418	0.11448	428.287	0.11248
LE1	Syringe1	#N/A	490.499	5.28477	490.193	5.28147	-36.3082	0.0107743	0.044	-0.011	0.01	42236.9	42236.9	165.3	128	31	403.263	0.116	25.2149	0.00855	403.132	0.113	25.2067	0.00886	4592.66	2.68618	0.0625271	3.0032e-05	0.023	0.001	1.095	0.009	1.159	0.001	428.478	0.12455	428.347	0.12155
TT	Syringe1	#N/A	490.438	5.28329	490.127	5.27995	-36.4569	0.0107726	0.045	-0.019	0.01	42236.9	42236.9	169.5	130	34	1001.17	0.348	50.0876	0.01561	1000.81	0.358	50.0693	0.0162	3474.78	0.973238	0.050029	1.0881e-05	0.026	0.001	1.096	0.006	1.166	0.001	1051.26	0.36361	1050.89	0.37361
TT	Syringe1	#N/A	490.453	5.2845	490.139	5.28113	-36.2657	0.0107747	0.045	-0.011	0.01	42236.9	42236.9	168.4	129	33	1000.54	0.238	50.0445	0.0149	1000.22	0.241	50.0288	0.01557	3473.77	1.24506	0.0500176	1.392e-05	0.022	0.001	1.088	0.007	1.166	0.001	1050.58	0.2529	1050.27	0.2559
TT	Syringe1	#N/A	490.547	5.285	490.231	5.2816	-36.3591	0.0107737	0.046	-0.017	0.01	42236.9	42236.9	162.5	125	29	1000.92	0.206	50.0653	0.01034	1000.63	0.207	50.051	0.01092	3473.93	1.04721	0.0500194	1.1708e-05	0.02	0.001	1.092	0.006	1.166	0	1050.98	0.21634	1050.7	0.21734
LE2	Syringe1	#N/A	490.504	5.28474	490.186	5.2813	-36.3241	0.0107741	0.046	-0.013	0.011	42236.9	42236.9	168.3	130	33	397.866	0.115	101.107	0.03506	397.701	0.113	101.065	0.03684	21729.7	11.1991	0.254123	0.000125208	0.029	0.001	2.327	0.008	2.402	0.001	498.973	0.15006	498.808	0.14806
LE2	Syringe1	#N/A	490.46	5.28385	490.139	5.2804	-36.3981	0.0107733	0.046	-0.012	0.01	42236.9	42237	176.5	136	39	397.608	0.106	101.061	0.02786	397.42	0.102	101.013	0.02892	21734.2	10.0595	0.254173	0.000112467	0.033	0.001	2.342	0.009	2.401	0.002	498.669	0.13386	498.481	0.12986
LE2	Syringe1	#N/A	490.456	5.28573	490.127	5.28219	-36.0476	0.0107772	0.047	-0.019	0.011	42237	42237	193.8	147	53	397.441	0.196	101.048	0.03493	397.257	0.194	101.001	0.03542	21740.8	11.1987	0.254246	0.000125204	0.033	0.001	2.349	0.012	2.4	0.001	498.489	0.23093	498.305	0.22893
HE2	Syringe1	#N/A	490.402	5.28465	490.075	5.28112	-36.1396	0.0107762	0.047	-0.019	0.01	42237	42237	225.9	171	76	2006.05	1.177	99.9893	0.05488	2005.22	1.147	99.948	0.05354	3458.22	0.945421	0.0498438	1.057e-05	0.029	0.002	1.116	0.008	1.171	0.001	2106.04	1.23188	2105.21	1.20188
HE2	Syringe1	#N/A	490.518	5.28791	490.188	5.28435	-35.772	0.0107803	0.048	-0.019	0.01	42237	42237	202.4	153	59	2003.78	0.965	99.8544	0.05412	2003.01	0.98	99.8161	0.05519	3457.26	1.07896	0.049833	1.2063e-05	0.027	0.001	1.122	0.012	1.171	0.001	2103.64	1.01912	2102.87	1.03412
HE2	Syringe1	#N/A	490.487	5.28605	490.149	5.2824	-36.0517	0.0107771	0.049	-0.016	0.011	42237	42237	167.9	128	32	2000.22	0.88	99.6484	0.04179	1999.4	0.909	99.6076	0.04348	3455.99	0.884242	0.0498188	9.886e-06	0.029	0.001	1.117	0.015	1.172	0	2099.87	0.92179	2099.05	0.95079
HE2	Syringe1	#N/A	490.415	5.27762	490.077	5.27398	-37.447	0.0107615	0.049	-0.003	0.009	42132.4	42132.4	164.6	128	31	2002.63	0.861	99.5189	0.03785	2001.63	0.878	99.4691	0.03902	3444.83	1.33092	0.0496941	1.488e-05	0.035	0.001	1.145	0.005	1.172	0.001	2102.15	0.89885	2101.15	0.91585
HE2	Syringe1	#N/A	490.559	5.28548	490.258	5.28224	-36.296	0.0107744	0.043	-0.008	0.009	42132.4	42132.4	159.1	124	26	2002.76	0.679	99.5085	0.03487	2002.04	0.694	99.4728	0.03579	3444.07	1.25499	0.0496856	1.4031e-05	0.025	0.001	1.152	0.009	1.172	0.001	2102.27	0.71387	2101.55	0.72887
HE2	Syringe1	#N/A	490.654	5.28972	490.37	5.28667	-35.7094	0.010781	0.041	-0.005	0.009	42132.4	42132.4	158.8	125	26	2004.2	0.522	99.6154	0.02831	2003.58	0.529	99.585	0.02873	3445.67	1.0964	0.0497035	1.2258e-05	0.022	0.001	1.154	0.01	1.172	0.001	2103.81	0.55031	2103.2	0.55731
HE2	Syringe1	#N/A	490.619	5.29066	490.342	5.28768	-35.4692	0.0107836	0.04	-0.011	0.009	42132.5	42132.5	160.7	125	27	2004.18	0.492	99.6238	0.02402	2003.62	0.506	99.5958	0.02511	3446.08	0.954008	0.049708	1.0666e-05	0.02	0.001	1.154	0.014	1.171	0.001	2103.8	0.51602	2103.24	0.53002
HE2	Syringe1	#N/A	490.663	5.28911	490.393	5.2862	-35.8392	0.0107795	0.039	-0.009	0.008	42132.5	42132.5	148.4	116	19	2005.2	0.508	99.6816	0.01336	2004.7	0.512	99.6566	0.01348	3446.39	1.21501	0.0497116	1.3584e-05	0.018	0.001	1.144	0.011	1.172	0.001	2104.88	0.52136	2104.38	0.52536
HE2	Syringe1	#N/A	490.799	5.29247	490.535	5.28963	-35.4926	0.0107834	0.038	-0.009	0.009	42132.5	42132.5	160.4	126	27	2004.44	0.672	99.6325	0.02916	2003.92	0.686	99.607	0.03046	3445.9	1.37896	0.049706	1.5417e-05	0.018	0.001	1.164	0.017	1.171	0.001	2104.07	0.70116	2103.55	0.71516
HE1	Syringe1	#N/A	490.727	5.29072	490.468	5.28793	-35.6701	0.0107814	0.037	-0.011	0.009	42132.5	42132.5	158.9	127	27	2024.17	0.753	25.4946	0.01205	2023.67	0.776	25.4882	0.01238	126.551	0.280585	0.0125951	3.137e-06	0.018	0.001	0.378	0.006	0.398	0	2049.67	0.76505	2049.16	0.78805
HE1	Syringe1	#N/A	491.21	5.29375	490.953	5.29099	-36.0664	0.010777	0.037	-0.013	0.009	42132.5	42132.5	159.4	128	27	2023.58	0.51	25.4774	0.00835	2023.16	0.518	25.4721	0.00851	126.121	0.259477	0.0125903	2.901e-06	0.015	0.001	0.369	0.024	0.399	0	2049.06	0.51835	2048.64	0.52635
HE1	Syringe1	#N/A	491.503	5.29729	491.241	5.29447	-35.9982	0.0107777	0.038	-0.006	0.009	42132.5	42132.5	166.5	132	33	2024.56	0.603	25.4597	0.00691	2024.1	0.615	25.454	0.00714	124.796	0.279333	0.0125754	3.123e-06	0.016	0.001	0.36	0.015	0.397	0	2050.02	0.60991	2049.56	0.62191
HE1	Syringe1	#N/A	491.668	5.29892	491.409	5.29612	-36.0257	0.0107774	0.037	-0.013	0.009	42132.5	42132.5	160.4	128	27	2024.75	0.596	25.4526	0.00747	2024.26	0.613	25.4465	0.00765	124.377	0.11896	0.0125708	1.33e-06	0.017	0.001	0.367	0.012	0.397	0	2050.2	0.60347	2049.71	0.62047
HE1	Syringe1	#N/A	491.705	5.29663	491.446	5.29384	-36.5143	0.010772	0.037	-0.014	0.009	42132.5	42132.5	156.6	125	25	2025.12	0.798	25.4487	0.00564	2024.75	0.813	25.4441	0.00581	123.998	0.368866	0.0125665	4.124e-06	0.013	0.001	0.374	0.016	0.398	0	2050.57	0.80364	2050.2	0.81864
HE1	Syringe1	#N/A	491.63	5.29829	491.372	5.2955	-36.0658	0.010777	0.037	0.001	0.009	42132.5	42132.5	153.9	123	22	2025.91	0.425	25.4582	0.00536	2025.46	0.432	25.4526	0.00542	123.981	0.166723	0.0125663	1.864e-06	0.016	0.001	0.378	0.007	0.397	0.001	2051.37	0.43036	2050.92	0.43736
LE2	Syringe1	#N/A	490.592	5.28208	490.282	5.27874	-36.9811	0.0107667	0.045	-0.011	0.009	42132.5	42132.5	160.5	128	28	398.889	0.109	100.65	0.03054	398.755	0.11	100.617	0.03173	21569	9.46235	0.252326	0.000105791	0.024	0.001	2.371	0.012	2.399	0.001	499.539	0.13954	499.406	0.14054
LE2	Syringe1	#N/A	490.616	5.28872	490.349	5.28585	-35.8167	0.0107798	0.039	0.001	0.009	42132.5	42132.5	160.8	128	28	399.418	0.128	100.59	0.02732	399.292	0.127	100.558	0.02767	21525.6	9.48677	0.251841	0.000106064	0.022	0.001	2.357	0.013	2.4	0.001	500.007	0.15532	499.882	0.15432
LE2	Syringe1	#N/A	490.568	5.29396	490.314	5.29122	-34.7673	0.0107915	0.037	-0.002	0.009	42132.6	42132.6	159.5	126	26	398.587	0.14	100.632	0.02091	398.484	0.138	100.606	0.02174	21582.1	10.65	0.252472	0.000119069	0.018	0.001	2.363	0.015	2.4	0.001	499.219	0.16091	499.116	0.15891
LE2	Syringe1	#N/A	490.527	5.29767	490.274	5.29494	-34.0098	0.0108	0.037	-0.008	0.009	42132.6	42132.6	152.8	121	22	398.366	0.097	100.662	0.01447	398.263	0.095	100.636	0.0149	21601.3	6.77662	0.252687	7.5764e-05	0.018	0.001	2.359	0.004	2.401	0.001	499.028	0.11147	498.925	0.10947
LE2	Syringe1	#N/A	490.59	5.30197	490.338	5.29925	-33.3505	0.0108073	0.036	-0.012	0.009	42132.6	42132.6	161	128	28	398.247	0.167	100.717	0.0301	398.139	0.165	100.689	0.03075	21620.3	13.7977	0.252899	0.000154261	0.019	0.001	2.348	0.01	2.401	0.002	498.964	0.1971	498.855	0.1951
LE2	Syringe1	#N/A	490.572	5.30562	490.325	5.30294	-32.6503	0.0108152	0.036	-0.004	0.009	42132.6	42132.6	160.3	126	28	397.993	0.154	100.712	0.02447	397.901	0.153	100.689	0.02467	21633.7	11.7305	0.25305	0.000131149	0.017	0	2.359	0.006	2.401	0.001	498.705	0.17847	498.613	0.17747
TT	Syringe1	#N/A	490.482	5.2993	490.237	5.29666	-33.624	0.0108043	0.035	-0.007	0.009	42132.6	42132.6	156	124	25	1000.38	0.364	50.0757	0.01493	1000.17	0.367	50.0649	0.01505	3477.24	1.38039	0.0500565	1.5433e-05	0.015	0	1.136	0.008	1.167	0.001	1050.46	0.37893	1050.24	0.38193
TT	Syringe1	#N/A	490.638	5.30323	490.392	5.30056	-33.2164	0.0108088	0.036	-0.001	0.009	42132.6	42132.6	162.1	129	28	1001.01	0.269	50.0168	0.0153	1000.81	0.275	50.0069	0.01574	3469.18	1.09953	0.0499663	1.2293e-05	0.014	0.001	1.129	0.008	1.166	0	1051.03	0.2843	1050.83	0.2903
TT	Syringe1	#N/A	490.794	5.30592	490.545	5.30324	-33.0314	0.0108109	0.036	-0.015	0.009	42132.6	42132.6	156.1	125	25	1001.25	0.255	50.0075	0.0154	1001.03	0.258	49.9968	0.01599	3467.29	1.54532	0.0499452	1.7277e-05	0.015	0.001	1.121	0.007	1.166	0.001	1051.25	0.2704	1051.04	0.2734
TT	Syringe1	#N/A	490.741	5.3054	490.494	5.30273	-33.0227	0.010811	0.036	-0.011	0.009	42132.6	42132.6	157.6	125	26	1001.4	0.31	50.0148	0.01223	1001.2	0.32	50.0047	0.01295	3467.25	1.01322	0.0499447	1.1328e-05	0.014	0.001	1.119	0.005	1.166	0.001	1051.42	0.32223	1051.22	0.33223
TT	Syringe1	#N/A	490.681	5.30516	490.437	5.30252	-32.948	0.0108118	0.035	-0.015	0.009	42132.6	42132.6	162	129	29	1001.39	0.336	49.9982	0.01729	1001.16	0.342	49.987	0.01775	3465.84	1.15087	0.049929	1.2867e-05	0.016	0.001	1.132	0.004	1.166	0.001	1051.39	0.35329	1051.16	0.35929
TT	Syringe1	#N/A	490.724	5.30546	490.477	5.30279	-32.9784	0.0108115	0.035	-0.007	0.009	42132.6	42132.6	157.7	126	26	1001.36	0.254	50.0002	0.01546	1001.16	0.254	49.9901	0.01565	3466.13	1.67823	0.0499322	1.8763e-05	0.014	0	1.126	0.01	1.166	0.001	1051.36	0.26946	1051.16	0.26946
LE1	Syringe1	#N/A	490.963	5.31283	490.719	5.3102	-32.1054	0.0108213	0.035	-0.011	0.009	42132.6	42132.6	158.6	128	28	403.997	0.117	25.2118	0.00543	403.922	0.114	25.2071	0.00557	4581.82	2.14388	0.0624059	2.3969e-05	0.013	0.001	1.123	0.008	1.159	0.001	429.209	0.12243	429.134	0.11943
LE1	Syringe1	#N/A	490.673	5.30365	490.43	5.30103	-33.2064	0.0108089	0.035	-0.003	0.009	42132.6	42132.6	145.3	116	16	403.48	0.091	25.1922	0.00381	403.404	0.091	25.1875	0.00386	4584.64	1.44926	0.0624374	1.6203e-05	0.013	0	1.127	0.003	1.16	0.001	428.672	0.09481	428.596	0.09481
LE1	Syringe1	#N/A	490.588	5.30033	490.344	5.29769	-33.6468	0.010804	0.035	-0.01	0.009	42132.6	42132.6	160.2	129	28	403.243	0.105	25.17	0.01018	403.169	0.103	25.1654	0.01036	4582.99	2.20899	0.0624189	2.4697e-05	0.013	0.001	1.131	0.005	1.159	0	428.413	0.11518	428.339	0.11318
LE1	Syringe1	#N/A	490.467	5.29736	490.222	5.29472	-33.9481	0.0108007	0.035	-0.002	0.009	42132.6	42132.6	142.7	113	14	403.089	0.105	25.1765	0.00348	403.001	0.106	25.171	0.00343	4586.56	1.59112	0.0624589	1.7789e-05	0.016	0	1.132	0.009	1.16	0	428.266	0.10848	428.177	0.10948
LE1	Syringe1	#N/A	490.457	5.29612	490.213	5.29348	-34.1549	0.0107983	0.035	-0.006	0.009	42132.6	42132.6	146.6	117	17	403.127	0.184	25.1635	0.00692	403.044	0.184	25.1583	0.00696	4583.15	2.85254	0.0624207	3.1892e-05	0.015	0	1.119	0.006	1.159	0	428.29	0.19092	428.207	0.19092
NA2	Syringe1	#N/A	490.595	5.2795	490.33	5.27666	-37.4558	0.0107614	#N/A	#N/A	#N/A	40334.7	40334.7	#N/A	#N/A	30	1022.01	0.265	11.1084	0.00458	1021.59	0.265	11.1039	0.00461	-27.8172	0.290335	0.0108692	3.246e-06	0.029	0.001	1.532	0.007	1.577	0.001	1033.12	0.26958	1032.7	0.26958
NA2	Syringe1	#N/A	490.62	5.27957	490.389	5.27708	-37.493	0.010761	#N/A	#N/A	#N/A	40334.7	40334.7	#N/A	#N/A	32	1022.28	0.394	11.1108	0.00529	1021.86	0.403	11.1062	0.00533	-27.866	0.331389	0.0108687	3.705e-06	0.029	0.002	1.526	0.005	1.577	0.001	1033.39	0.39929	1032.97	0.40829
NA2	Syringe1	#N/A	490.29	5.27587	490.043	5.27322	-37.5204	0.0107607	#N/A	#N/A	#N/A	40348.1	40348.1	#N/A	#N/A	32	1022.2	0.381	11.11	0.00433	1021.64	0.404	11.1039	0.00454	-27.8596	0.355808	0.0108687	3.978e-06	0.039	0.003	1.531	0.012	1.578	0.001	1033.31	0.38533	1032.75	0.40833
NA2	Syringe1	#N/A	490.627	5.27859	490.254	5.27457	-37.6871	0.0107589	#N/A	#N/A	#N/A	40337.7	40337.7	#N/A	#N/A	24	1022.25	0.249	11.1089	0.00419	1021.54	0.247	11.1012	0.00432	-28.0036	0.379152	0.0108671	4.239e-06	0.049	0.002	1.552	0.007	1.577	0	1033.36	0.25319	1032.65	0.25119
NA2	Syringe1	#N/A	490.377	5.27701	490.122	5.27426	-37.4848	0.0107611	#N/A	#N/A	#N/A	40347.8	40347.8	#N/A	#N/A	33	1022.11	0.295	11.1115	0.00383	1021.6	0.314	11.1059	0.004	-27.6428	0.194004	0.0108711	2.169e-06	0.036	0.002	1.531	0.011	1.577	0.001	1033.22	0.29883	1032.71	0.31783
NA2	Syringe1	#N/A	490.55	5.27966	490.268	5.27663	-37.3396	0.0107627	#N/A	#N/A	#N/A	40339	40339	#N/A	#N/A	33	1021.9	0.312	11.1073	0.00381	1021.27	0.319	11.1004	0.00378	-27.8104	0.288904	0.0108693	3.23e-06	0.044	0.002	1.533	0.016	1.577	0.001	1033	0.31581	1032.37	0.32281
NA2	Syringe1	#N/A	491.244	5.28719	491	5.28457	-37.3274	0.0107629	#N/A	#N/A	#N/A	40339.6	40339.6	#N/A	#N/A	32	1022.01	0.383	11.1104	0.00394	1021.19	0.393	11.1015	0.00406	-27.6409	0.393016	0.0108712	4.394e-06	0.057	0.002	1.544	0.012	1.581	0.001	1033.12	0.38694	1032.3	0.39694

## Sheet: Precision tests
Data of replicate precision tests. All data is compensated for memory effect errors and calibrated as per Dickinson et al. 2017.
Sample Code	Vessel Code	Measurement Code	12CO2 Dry Baseline	13CO2 Dry Baseline	12CO2 Baseline	13CO2 Baseline	Delta Baseline	Ratio Baseline	H2O Baseline	CH4 Baseline	CH4 HP Baseline	Time triggered	Time de-triggered	Time elapsed (seconds)	Data elapsed	Measurement interval (datapoints)	Mean 12CO2 Dry	Std 12CO2 Dry	Mean 13CO2 Dry	Std 13CO2 Dry	Mean 12CO2	Std 12CO2	Mean 13CO2	Std 13CO2	Mean Delta	Std Delta	Mean Ratio	Std Ratio	Mean H2O	Std H2O	Mean CH4	Std CH4	Mean CH4 HP	Std CH4 HP	Mean CO2 Dry	Std CO2 dry	Mean CO2	Std CO2
N-2000	syringe1	1	490.317	5.2789	489.968	5.27514	-37.0213	0.0107663	0.05	-0.008	0.011	42237.1	42237.1	135.7	104	8	1979.79	0.131	21.4811	0.00259	1976.25	0.131	21.4427	0.0026	-29.5175	0.099551	0.0108502	1.113e-06	0.126	0	1.488	0.003	1.634	0.001	2001.27	0.13359	1997.7	0.1336
N-2000	syringe1	2	490.888	5.28425	490.536	5.28046	-37.1664	0.0107647	0.051	-0.009	0.011	42237.1	42237.1	156.9	120	24	1978.71	0.499	21.475	0.00633	1975.34	0.495	21.4385	0.00627	-29.2603	0.220479	0.0108531	2.465e-06	0.12	0.001	1.437	0.007	1.637	0.002	2000.18	0.50533	1996.78	0.50127
N-2000	syringe1	3	490.903	5.28779	490.548	5.28398	-36.5492	0.0107716	0.051	-0.004	0.011	42237.1	42237.1	147.7	113	17	1979.4	0.475	21.48	0.00674	1976.04	0.483	21.4435	0.00685	-29.3766	0.293286	0.0108518	3.279e-06	0.12	0.001	1.423	0.021	1.636	0.001	2000.88	0.48174	1997.48	0.48985
N-1500	syringe1	1	490.833	5.28598	490.479	5.28216	-36.744	0.0107694	0.051	-0.012	0.011	42237.1	42237.1	156.1	120	24	1538.87	0.315	16.6358	0.00475	1535.02	0.32	16.5941	0.00484	-33.0806	0.200444	0.0108104	2.241e-06	0.177	0.001	0.199	0.019	0.266	0.001	1555.51	0.31975	1551.62	0.32484
N-1500	syringe1	2	490.892	5.28517	490.535	5.28133	-37.0062	0.0107665	0.052	-0.007	0.01	42237.1	42237.1	154.6	119	23	1538.02	0.572	16.629	0.00572	1534.07	0.572	16.5864	0.00571	-32.9325	0.316184	0.010812	3.535e-06	0.181	0	0.195	0.009	0.268	0.001	1554.65	0.57772	1550.65	0.57771
N-1500	syringe1	3	490.814	5.2873	490.453	5.28341	-36.4654	0.0107725	0.052	-0.007	0.01	42237.1	42237.1	170.3	131	35	1537.28	0.524	16.6171	0.005	1533.28	0.521	16.5739	0.005	-33.1642	0.293823	0.0108094	3.285e-06	0.184	0.001	0.198	0.012	0.269	0.002	1553.9	0.529	1549.86	0.526
N-1000	syringe1	1	490.885	5.28692	490.524	5.28304	-36.6734	0.0107702	0.052	0.006	0.01	42237.1	42237.1	153.6	119	21	996.068	0.379	10.8386	0.00464	993.108	0.375	10.8064	0.00466	-26.7287	0.508399	0.0108814	5.684e-06	0.21	0.001	1.392	0.01	1.619	0.002	1006.91	0.38364	1003.91	0.37966
N-1000	syringe1	2	490.767	5.28421	490.401	5.28026	-36.9368	0.0107672	0.053	-0.009	0.01	42237.1	42237.1	146.9	113	17	995.655	0.221	10.8381	0.00351	992.715	0.219	10.806	0.00358	-26.3724	0.354645	0.0108854	3.965e-06	0.209	0.001	1.387	0.003	1.619	0.002	1006.49	0.22451	1003.52	0.22258
N-1000	syringe1	3	490.801	5.28411	490.432	5.28013	-37.0213	0.0107663	0.053	-0.008	0.011	42237.1	42237.1	156	121	23	995.135	0.369	10.83	0.00394	992.188	0.365	10.7979	0.0039	-26.589	0.38926	0.0108829	4.352e-06	0.209	0.001	1.391	0.007	1.619	0.002	1005.96	0.37294	1002.99	0.3689
N-600	syringe1	1	490.707	5.28292	490.338	5.27895	-37.0531	0.0107659	0.053	0.006	0.011	42237.1	42237.1	151.4	117	20	599.711	0.228	6.48463	0.00353	597.93	0.228	6.46538	0.00352	-32.8499	0.293376	0.0108129	3.28e-06	0.21	0	0.27	0.005	0.352	0.001	606.195	0.23153	604.396	0.23152
N-600	syringe1	2	490.536	5.28111	490.161	5.27707	-37.0481	0.010766	0.054	-0.01	0.01	42237.1	42237.1	150.4	117	20	599.582	0.154	6.48241	0.00413	597.848	0.153	6.46366	0.00409	-32.9734	0.400977	0.0108116	4.483e-06	0.204	0.001	0.285	0.015	0.353	0.001	606.064	0.15813	604.312	0.15709
N-600	syringe1	3	490.534	5.28219	490.16	5.27816	-36.8465	0.0107682	0.054	-0.001	0.01	42237.1	42237.1	138.9	107	11	599.418	0.076	6.48208	0.00407	597.645	0.076	6.46291	0.00406	-32.7571	0.542298	0.010814	6.063e-06	0.209	0.001	0.272	0.014	0.355	0	605.9	0.08007	604.108	0.08006
N-300	syringe1	1	490.462	5.28265	490.084	5.27858	-36.6213	0.0107708	0.055	0.002	0.01	42237.1	42237.1	155.2	120	23	323.229	0.134	3.48685	0.00387	322.586	0.133	3.47992	0.00386	-35.1184	0.639076	0.0107876	7.145e-06	0.141	0.001	0.018	0.007	0.048	0.002	326.715	0.13787	326.066	0.13686
N-300	syringe1	2	490.206	5.27838	489.829	5.27431	-36.8983	0.0107677	0.055	-0.003	0.01	42237.1	42237.1	155.3	120	24	323.21	0.13	3.48724	0.00319	322.549	0.128	3.4801	0.00319	-34.9567	0.822526	0.0107894	9.196e-06	0.145	0.001	0.012	0.012	0.051	0.002	326.697	0.13319	326.029	0.13119
N-300	syringe1	3	490.152	5.27689	489.775	5.27283	-37.0635	0.0107658	0.054	-0.009	0.01	42237.1	42237.1	147.4	114	17	323.2	0.165	3.48583	0.00328	322.534	0.163	3.47864	0.00328	-35.3163	0.782634	0.0107854	8.75e-06	0.146	0.001	0.027	0.004	0.052	0.002	326.686	0.16828	326.012	0.16628
2-2000	syringe1	1	490.137	5.27796	489.763	5.27394	-36.8387	0.0107683	0.054	-0.004	0.01	42237.1	42237.1	195.6	149	53	1946.44	0.806	39.8429	0.01482	1942.19	0.769	39.7558	0.01399	830.88	0.384609	0.0204696	4.3e-06	0.155	0.002	0.532	0.02	0.642	0.003	1986.29	0.82082	1981.94	0.78299
2-2000	syringe1	2	490.68	5.28593	490.313	5.28197	-36.4511	0.0107727	0.053	-0.006	0.011	42237.1	42237.1	160	123	27	1945	0.669	39.8077	0.00944	1940.76	0.668	39.7208	0.00946	830.615	0.507862	0.0204666	5.678e-06	0.154	0	0.539	0.026	0.645	0.004	1984.81	0.67844	1980.48	0.67746
2-2000	syringe1	3	490.673	5.28968	490.306	5.28572	-35.7541	0.0107805	0.053	0.002	0.011	42237.2	42237.2	152.9	117	21	1944.26	0.604	39.8001	0.00874	1939.94	0.609	39.7116	0.00877	830.962	0.56126	0.0204705	6.275e-06	0.157	0	0.526	0.013	0.647	0.002	1984.06	0.61274	1979.65	0.61777
2-1000	syringe1	1	490.731	5.28626	490.361	5.28228	-36.4907	0.0107722	0.054	-0.002	0.011	42237.2	42237.2	160.8	124	28	981.851	0.445	19.5776	0.00525	979.662	0.445	19.5339	0.00542	783.459	0.856514	0.0199394	9.576e-06	0.158	0.001	1.314	0.005	1.494	0.002	1001.43	0.45025	999.195	0.45042
2-1000	syringe1	2	490.612	5.28706	490.243	5.28309	-36.1122	0.0107765	0.053	-0.005	0.011	42237.2	42237.2	175.8	135	38	981.317	0.261	19.5704	0.00518	979.094	0.26	19.5261	0.00518	783.78	0.607413	0.019943	6.791e-06	0.16	0.001	1.329	0.006	1.494	0.002	1000.89	0.26618	998.62	0.26518
2-1000	syringe1	3	490.571	5.28672	490.2	5.28273	-36.0933	0.0107767	0.054	0.002	0.011	42237.2	42237.2	144.3	112	15	981.046	0.381	19.5591	0.00561	978.86	0.379	19.5155	0.0056	783.239	0.660901	0.019937	7.389e-06	0.157	0	1.336	0.013	1.495	0.001	1000.6	0.38661	998.375	0.3846
2-300	syringe1	1	490.593	5.28756	490.219	5.28354	-35.9834	0.0107779	0.054	-0.008	0.01	42237.2	42237.2	126.2	98	1	296.719	0	5.9679	0	295.887	0	5.95116	0	798.979	0	0.0201129	0	0.198	0	0.18	0	0.224	0	302.687	0	301.838	0
2-300	syringe1	2	490.326	5.28282	489.95	5.27877	-36.3237	0.0107741	0.054	0.002	0.01	42237.2	42237.2	153.2	119	22	296.038	0.13	5.95053	0.00328	295.219	0.13	5.93408	0.00327	797.874	0.7719	0.0201006	8.63e-06	0.195	0	0.179	0.008	0.226	0	301.988	0.13328	301.153	0.13327
2-300	syringe1	3	490.57	5.28838	490.197	5.28437	-35.7887	0.0107801	0.054	-0.004	0.01	42237.2	42237.2	157.4	122	26	296.59	0.116	5.96092	0.00376	295.717	0.114	5.94336	0.00374	797.658	1.43423	0.0200982	1.6035e-05	0.208	0.001	0.185	0.01	0.228	0	302.551	0.11976	301.66	0.11774
3-2000	syringe1	1	490.226	5.28123	489.844	5.27712	-36.4162	0.0107731	0.055	-0.011	0.01	42237.2	42237.2	149.6	115	19	1926.57	0.496	59.206	0.00971	1922.43	0.497	59.0787	0.00973	1748.72	0.785943	0.0307313	8.787e-06	0.152	0.001	0.724	0.021	0.863	0.002	1985.78	0.50571	1981.51	0.50673
3-2000	syringe1	2	490.315	5.28218	489.933	5.27807	-36.4182	0.010773	0.055	-0.012	0.011	42237.2	42237.2	137.5	105	9	1925.39	0.386	59.1674	0.005	1921.13	0.385	59.0367	0.00509	1748.62	0.297401	0.0307301	3.325e-06	0.156	0.001	0.755	0	0.862	0.001	1984.55	0.391	1980.17	0.39009
3-2000	syringe1	3	490.582	5.28775	490.204	5.28368	-35.9271	0.0107785	0.054	-0.012	0.011	42237.2	42237.2	147.1	113	16	1925.12	0.387	59.1462	0.00806	1920.77	0.388	59.0122	0.00834	1748.01	0.625302	0.0307233	6.991e-06	0.16	0.001	0.725	0.017	0.864	0.002	1984.27	0.39506	1979.78	0.39634
3-1500	syringe1	1	490.589	5.29022	490.211	5.28615	-35.4898	0.0107834	0.055	-0.003	0.011	42237.2	42237.2	161	123	28	1446.96	0.493	44.649	0.01172	1443.27	0.499	44.5349	0.01199	1759.97	0.761257	0.030857	8.511e-06	0.18	0.001	0.794	0.002	0.912	0.001	1491.61	0.50472	1487.8	0.51099
3-1500	syringe1	2	490.572	5.28765	490.192	5.28355	-35.9273	0.0107785	0.055	-0.002	0.011	42237.2	42237.2	160.3	123	27	1446.78	0.565	44.6312	0.01259	1443.09	0.562	44.5175	0.01254	1759.22	0.717071	0.0308487	8.017e-06	0.18	0	0.801	0.003	0.912	0.001	1491.41	0.57759	1487.61	0.57454
3-1500	syringe1	3	490.553	5.28953	490.176	5.28546	-35.5461	0.0107828	0.055	-0.005	0.011	42237.2	42237.2	158.3	122	25	1446.03	0.435	44.6035	0.01424	1442.29	0.435	44.4881	0.01437	1758.93	0.79131	0.0308454	8.847e-06	0.183	0.001	0.791	0.01	0.914	0.001	1490.64	0.44924	1486.78	0.44937
3-600	syringe1	1	490.483	5.28756	490.105	5.28348	-35.7682	0.0107803	0.055	-0.001	0.01	42237.2	42237.2	157.8	123	25	585.218	0.168	18.1095	0.00706	583.597	0.166	18.0593	0.00716	1767.82	1.10803	0.0309448	1.2388e-05	0.196	0.001	0.407	0.004	0.48	0	603.327	0.17506	601.656	0.17316
3-600	syringe1	2	490.435	5.2853	490.053	5.28119	-36.0835	0.0107768	0.055	-0.009	0.01	42237.2	42237.2	160	124	26	585.122	0.173	18.1029	0.00433	583.505	0.172	18.0529	0.00434	1767.27	0.89265	0.0309387	9.98e-06	0.195	0	0.411	0.004	0.48	0.001	603.225	0.17733	601.558	0.17634
3-600	syringe1	3	490.324	5.28594	489.939	5.28179	-35.7496	0.0107805	0.056	-0.003	0.011	42237.2	42237.2	137.5	106	9	584.735	0.197	18.0877	0.00431	583.115	0.196	18.0376	0.00431	1766.79	0.650525	0.0309332	7.273e-06	0.196	0	0.406	0.004	0.482	0	602.822	0.20131	601.153	0.20031
3-300	syringe1	1	490.706	5.28603	490.435	5.28311	-36.4841	0.0107723	0.039	0	0.008	42237.4	42237.4	159.6	123	25	298.719	0.133	9.02426	0.00418	297.728	0.132	8.9943	0.00417	1702.08	1.54881	0.0302098	1.7316e-05	0.234	0	0.359	0.011	0.427	0.001	307.744	0.13718	306.722	0.13617
3-300	syringe1	2	490.529	5.28657	490.247	5.28352	-36.0394	0.0107773	0.041	0	0.008	42237.4	42237.4	156.9	122	25	298.742	0.13	9.02612	0.0041	297.764	0.129	8.99656	0.00407	1702.43	1.39067	0.0302138	1.5548e-05	0.231	0.001	0.366	0.009	0.428	0.001	307.768	0.1341	306.76	0.13307
3-300	syringe1	3	490.614	5.28193	490.34	5.27898	-37.052	0.010766	0.04	-0.007	0.008	42237.5	42237.5	149.6	115	19	298.892	0.092	9.02268	0.00428	297.878	0.091	8.99206	0.00429	1700.05	1.19542	0.030187	1.3365e-05	0.239	0	0.367	0.005	0.429	0	307.915	0.09628	306.87	0.09529
4-2000	syringe1	1	490.458	5.28538	490.176	5.28234	-36.1167	0.0107764	0.041	-0.002	0.007	42237.5	42237.5	208.2	156	62	1908.67	0.992	79.2299	0.03559	1904.13	0.939	79.0416	0.03329	2712.86	0.761257	0.0415105	8.511e-06	0.168	0.002	0.928	0.023	1.086	0.005	1987.9	1.02759	1983.18	0.97229
4-2000	syringe1	2	490.706	5.28844	490.426	5.28542	-36.0465	0.0107772	0.04	-0.006	0.008	42237.5	42237.5	162.5	123	28	1907	0.51	79.1767	0.01309	1902.35	0.512	78.9833	0.01327	2713.61	0.802132	0.0415189	8.968e-06	0.173	0	0.93	0.014	1.088	0.004	1986.18	0.52309	1981.33	0.52527
4-2000	syringe1	3	490.657	5.28803	490.374	5.28498	-36.0229	0.0107775	0.041	-0.003	0.008	42237.5	42237.5	162.8	124	29	1907.42	0.437	79.2101	0.02507	1902.57	0.45	79.0089	0.02578	2714.37	0.990591	0.0415274	1.1075e-05	0.179	0.001	0.939	0.01	1.091	0.005	1986.63	0.46207	1981.58	0.47578
4-1000	syringe1	1	490.601	5.28636	490.315	5.28327	-36.2188	0.0107753	0.041	0	0.008	42237.5	42237.5	227	174	79	966.265	0.746	40.7235	0.02642	964.403	0.711	40.645	0.0249	2769.63	1.07243	0.0421452	1.199e-05	0.136	0.003	1.285	0.014	1.5	0.004	1006.99	0.77242	1005.05	0.7359
4-1000	syringe1	2	490.679	5.29014	490.391	5.28704	-35.6827	0.0107813	0.042	-0.005	0.008	42237.5	42237.5	294	225	130	966.033	0.661	40.7185	0.01803	964.077	0.622	40.6361	0.01641	2770.08	1.25454	0.0421502	1.4026e-05	0.143	0.003	1.277	0.016	1.499	0.003	1006.75	0.67903	1004.71	0.63841
4-1000	syringe1	3	490.623	5.28992	490.332	5.28679	-35.6115	0.0107821	0.042	-0.005	0.008	42237.5	42237.5	158.6	122	26	965.261	0.282	40.6616	0.01707	963.385	0.287	40.5825	0.01742	2767.81	1.08469	0.0421249	1.2127e-05	0.137	0.001	1.282	0.016	1.506	0.004	1005.92	0.29907	1003.97	0.30442
4-300	syringe1	1	490.636	5.28938	490.345	5.28624	-35.7363	0.0107807	0.042	0.002	0.008	42237.5	42237.5	180.7	140	44	293.45	0.153	12.0589	0.00505	292.564	0.151	12.0225	0.00492	2675.58	2.10569	0.0410938	2.3542e-05	0.213	0.001	0.475	0.01	0.571	0.001	305.509	0.15805	304.586	0.15592
4-300	syringe1	2	490.527	5.29083	490.224	5.28756	-35.2582	0.010786	0.044	-0.002	0.008	42237.5	42237.5	158.1	123	26	293.667	0.156	12.0625	0.00573	292.76	0.155	12.0253	0.00572	2673.95	2.88904	0.0410755	3.23e-05	0.218	0.001	0.473	0.01	0.573	0.001	305.729	0.16173	304.785	0.16072
4-300	syringe1	3	490.584	5.28749	490.28	5.28421	-35.9778	0.010778	0.044	0	0.008	42237.6	42237.6	141	109	13	293.607	0.106	12.0654	0.00497	292.705	0.106	12.0283	0.00495	2675.58	0.951772	0.0410938	1.0641e-05	0.217	0	0.478	0.006	0.574	0.001	305.672	0.11097	304.733	0.11095
5-2000	syringe1	1	490.506	5.28839	490.204	5.28514	-35.66	0.0107815	0.044	-0.007	0.008	42237.6	42237.6	145.2	111	15	1888.1	0.711	99.3	0.01881	1883.81	0.706	99.0743	0.01898	3704.07	1.41509	0.0525925	1.5821e-05	0.161	0	1.108	0.017	1.341	0.002	1987.4	0.72981	1982.89	0.72498
5-2000	syringe1	2	490.734	5.2909	490.433	5.28766	-35.6522	0.0107816	0.044	0.002	0.008	42237.6	42237.6	160.5	123	26	1887.78	0.555	99.2625	0.02472	1883.42	0.566	99.0333	0.02552	3703.1	1.14363	0.0525816	1.2786e-05	0.163	0.001	1.094	0.009	1.342	0.004	1987.04	0.57972	1982.46	0.59152
5-2000	syringe1	3	490.777	5.29313	490.475	5.28987	-35.33	0.0107852	0.044	0.001	0.008	42237.6	42237.6	156	119	24	1886.75	0.549	99.2176	0.01802	1882.47	0.551	98.9925	0.01802	3703.54	1.29461	0.0525866	1.4474e-05	0.16	0.001	1.091	0.009	1.343	0.003	1985.97	0.56702	1981.46	0.56902
5-1500	syringe1	1	490.64	5.28999	490.333	5.28668	-35.6335	0.0107818	0.044	0.002	0.008	42237.6	42237.6	161.7	124	28	1413.84	0.607	74.3921	0.0204	1410.82	0.609	74.2332	0.02089	3706.27	1.63163	0.052617	1.8242e-05	0.151	0.001	1.101	0.015	1.346	0.005	1488.23	0.6274	1485.05	0.62989
5-1500	syringe1	2	490.632	5.28625	490.322	5.28291	-36.2992	0.0107744	0.045	0.001	0.008	42237.6	42237.6	161	124	27	1413.1	0.439	74.351	0.02621	1409.93	0.45	74.1843	0.02682	3706.12	1.13907	0.0526154	1.2735e-05	0.159	0.001	1.092	0.011	1.348	0.005	1487.45	0.46521	1484.12	0.47682
5-1500	syringe1	3	490.714	5.28896	490.398	5.28555	-35.9663	0.0107781	0.046	-0.001	0.008	42237.6	42237.6	163	126	29	1412.8	0.474	74.3214	0.02657	1409.77	0.483	74.1618	0.02699	3705.25	1.0998	0.0526057	1.2296e-05	0.152	0.001	1.098	0.017	1.348	0.006	1487.12	0.50057	1483.93	0.50999
5-1000	syringe1	1	490.686	5.29203	490.367	5.2886	-35.3507	0.010785	0.046	-0.007	0.008	42237.6	42237.6	163.6	127	29	946.341	0.374	49.6069	0.01402	943.945	0.372	49.4813	0.01407	3688.62	1.64067	0.0524197	1.8343e-05	0.179	0	1.078	0.005	1.328	0.004	995.948	0.38802	993.427	0.38607
5-1000	syringe1	2	490.705	5.29115	490.387	5.28773	-35.5487	0.0107828	0.046	-0.002	0.008	42237.7	42237.7	155.2	120	23	946.344	0.216	49.5993	0.01264	943.951	0.215	49.4738	0.01279	3687.88	0.921093	0.0524115	1.0298e-05	0.179	0.001	1.067	0.013	1.328	0.004	995.943	0.22864	993.425	0.22779
5-1000	syringe1	3	490.725	5.29099	490.404	5.28754	-35.6164	0.010782	0.046	0.003	0.008	42237.7	42237.7	162.6	125	29	946.33	0.234	49.6015	0.0153	943.943	0.237	49.4764	0.0155	3688.16	1.25051	0.0524146	1.3981e-05	0.178	0.001	1.082	0.014	1.33	0.004	995.931	0.2493	993.419	0.2525
5-600	syringe1	1	490.651	5.29149	490.326	5.28799	-35.3807	0.0107846	0.047	-0.002	0.008	42237.7	42237.7	160.9	125	28	570.147	0.153	29.9824	0.01014	568.751	0.155	29.909	0.0102	3703.6	1.66625	0.0525872	1.8629e-05	0.173	0.001	0.924	0.009	1.118	0.004	600.13	0.16314	598.66	0.1652
5-600	syringe1	2	490.696	5.29077	490.367	5.28723	-35.5996	0.0107822	0.047	-0.003	0.008	42237.7	42237.7	161.8	126	28	570.186	0.173	29.9699	0.007	568.83	0.169	29.8986	0.00709	3701.31	1.64103	0.0525616	1.8347e-05	0.168	0.001	0.913	0.012	1.118	0.002	600.156	0.18	598.728	0.17609
5-600	syringe1	3	490.65	5.29084	490.32	5.28728	-35.4982	0.0107833	0.048	-0.002	0.008	42237.7	42237.7	159.3	125	27	570.174	0.174	29.9727	0.00827	568.824	0.173	29.9018	0.00836	3701.86	1.74684	0.0525677	1.953e-05	0.167	0	0.924	0.006	1.119	0.002	600.147	0.18227	598.726	0.18136
5-300	syringe1	1	490.701	5.29022	490.367	5.28662	-35.7105	0.0107809	0.048	0.004	0.008	42237.7	42237.7	142.9	112	14	307.364	0.073	14.6436	0.0044	306.333	0.073	14.5946	0.00436	3261.35	1.45418	0.0476427	1.6258e-05	0.237	0	0.284	0.004	0.359	0	322.007	0.0774	320.928	0.07736
5-300	syringe1	2	490.61	5.29108	490.274	5.28746	-35.3739	0.0107847	0.049	-0.007	0.008	42237.7	42237.7	136.9	107	9	307.317	0.123	14.6484	0.00639	306.289	0.121	14.5994	0.00628	3263.38	0.345432	0.0476654	3.862e-06	0.236	0.001	0.276	0.003	0.359	0	321.965	0.12939	320.888	0.12728
5-300	syringe1	3	490.616	5.28976	490.274	5.28607	-35.6276	0.0107819	0.049	0.006	0.008	42237.7	42237.7	182.3	141	44	307.374	0.154	14.6424	0.00586	306.355	0.153	14.5939	0.00585	3260.85	3.10531	0.0476372	3.4718e-05	0.234	0	0.273	0.003	0.359	0	322.017	0.15986	320.949	0.15885

## Sheet: Consistency & drift measures
Data of long-term consistency & drift tests (9-months). All data is compensated for memory effect errors and calibrated as per Dickinson et al. 2017.
Sample Code	Vessel Code	Measurement Code	12CO2 Dry Baseline	13CO2 Dry Baseline	12CO2 Baseline	13CO2 Baseline	Delta Baseline	Ratio Baseline	H2O Baseline	CH4 Baseline	CH4 HP Baseline	Time triggered	Time de-triggered	Time elapsed (seconds)	Data elapsed	Measurement interval (datapoints)	Mean 12CO2 Dry	Std 12CO2 Dry	Mean 13CO2 Dry	Std 13CO2 Dry	Mean 12CO2	Std 12CO2	Mean 13CO2	Std 13CO2	Mean Delta	Std Delta	Mean Ratio	Std Ratio	Mean H2O	Std H2O	Mean CH4	Std CH4	Mean CH4 HP	Std CH4 HP	Mean CO2 Dry	Std CO2 dry	Mean CO2	Std CO2
NA2	Syringe1	#N/A	491.61	5.46637	491.245	5.46231	-5.44592	0.0111193	#N/A	#N/A	#N/A	40269.7	40269.7	#N/A	#N/A	65	1023.85	0.708	11.1374	0.00695	1023.49	0.736	11.1335	0.00726	-27.0346	0.390959	0.0108779	4.371e-06	0.025	0.003	1.538	0.013	1.576	0.002	1034.99	0.71495	1034.62	0.74326
NA2	Syringe1	#N/A	491.503	5.46211	491.049	5.45706	-6.00465	0.0111131	#N/A	#N/A	#N/A	40269.9	40269.9	#N/A	#N/A	52	1024.08	0.794	11.1415	0.0074	1023.58	0.817	11.1361	0.00764	-26.8918	0.411263	0.0108795	4.598e-06	0.035	0.002	1.591	0.01	1.576	0.003	1035.22	0.8014	1034.71	0.82464
NA2	Syringe1	#N/A	491.289	5.45418	490.978	5.45074	-7.01333	0.0111018	#N/A	#N/A	#N/A	40270.5	40270.5	#N/A	#N/A	64	1024.01	0.534	11.1386	0.00724	1023.7	0.545	11.1352	0.00735	-27.0851	0.32969	0.0108774	3.686e-06	0.022	0.002	1.528	0.006	1.576	0.002	1035.15	0.54124	1034.84	0.55235
NA2	Syringe1	#N/A	490.45	5.32496	490.123	5.3214	-28.8827	0.0108573	#N/A	#N/A	#N/A	40272.6	40272.6	#N/A	#N/A	43	1024.7	0.803	11.1407	0.0072	1024.38	0.806	11.1372	0.00725	-27.5474	0.451512	0.0108722	5.048e-06	0.022	0.001	1.522	0.012	1.579	0.002	1035.84	0.8102	1035.51	0.81325
NA2	Syringe1	#N/A	490.817	5.33327	490.487	5.32968	-28.0945	0.0108661	#N/A	#N/A	#N/A	40272.9	40272.9	#N/A	#N/A	49	1024.56	0.374	11.1505	0.00464	1024.19	0.373	11.1465	0.00465	-26.5633	0.320924	0.0108832	3.588e-06	0.025	0.001	1.567	0.013	1.577	0.002	1035.71	0.37864	1035.34	0.37765
NA2	Syringe1	#N/A	491.093	5.46225	490.787	5.45885	-5.14758	0.0111226	#N/A	#N/A	#N/A	40275.6	40275.6	#N/A	#N/A	60	1023.53	0.293	11.1296	0.00401	1023.28	0.304	11.1269	0.00421	-27.4087	0.356613	0.0108738	3.987e-06	0.017	0.002	1.519	0.009	1.578	0.002	1034.66	0.29701	1034.41	0.30821
NA2	Syringe1	#N/A	491.252	5.4612	490.952	5.45786	-5.66181	0.0111169	#N/A	#N/A	#N/A	40275.7	40275.7	#N/A	#N/A	35	1024.07	0.51	11.1346	0.00433	1023.79	0.509	11.1316	0.00441	-27.4812	0.370119	0.010873	4.138e-06	0.019	0.001	1.536	0.01	1.577	0.002	1035.2	0.51433	1034.92	0.51341
NA2	Syringe1	#N/A	491.22	5.46397	490.879	5.46018	-5.09268	0.0111233	#N/A	#N/A	#N/A	40275.9	40275.9	#N/A	#N/A	34	1024.43	0.355	11.1435	0.00476	1023.91	0.357	11.1379	0.00479	-27.0492	0.255899	0.0108778	2.861e-06	0.036	0.001	1.565	0.016	1.577	0.002	1035.57	0.35976	1035.05	0.36179
NA2	Syringe1	#N/A	490.65	5.33921	490.422	5.33673	-26.6799	0.0108819	#N/A	#N/A	#N/A	40276.5	40276.5	#N/A	#N/A	45	1024.65	0.469	11.1395	0.0037	1024.36	0.472	11.1363	0.00378	-27.6135	0.400261	0.0108715	4.475e-06	0.021	0.001	1.521	0.004	1.579	0.002	1035.79	0.4727	1035.49	0.47578
NA2	Syringe1	#N/A	490.69	5.33998	490.467	5.33755	-26.6191	0.0108826	#N/A	#N/A	#N/A	40276.6	40276.6	#N/A	#N/A	59	1023.61	0.412	11.1291	0.00439	1023.29	0.414	11.1256	0.00447	-27.5312	0.348026	0.0108724	3.891e-06	0.022	0.002	1.532	0.016	1.577	0.001	1034.74	0.41639	1034.42	0.41847
NA2	Syringe1	#N/A	490.699	5.3425	490.449	5.33977	-26.1794	0.0108875	#N/A	#N/A	#N/A	40276.8	40276.8	#N/A	#N/A	45	1024.15	0.407	11.1391	0.00537	1023.88	0.405	11.1362	0.00535	-27.1713	0.320119	0.0108764	3.579e-06	0.019	0.001	1.56	0.012	1.578	0.001	1035.29	0.41237	1035.02	0.41035
NA2	Syringe1	#N/A	490.753	5.34418	490.506	5.34148	-25.9794	0.0108897	#N/A	#N/A	#N/A	40276.9	40276.9	#N/A	#N/A	45	1024.41	0.529	11.143	0.00573	1024.11	0.544	11.1398	0.00589	-27.0739	0.382015	0.0108775	4.271e-06	0.021	0.002	1.542	0.009	1.578	0.002	1035.55	0.53473	1035.25	0.54989
NA2	Syringe1	#N/A	490.982	5.37005	490.699	5.36696	-21.7199	0.0109374	#N/A	#N/A	#N/A	40278.5	40278.5	#N/A	#N/A	51	1025.27	0.435	11.1463	0.00471	1024.93	0.441	11.1426	0.00477	-27.598	0.345879	0.0108716	3.867e-06	0.024	0.002	1.514	0.008	1.578	0.001	1036.41	0.43971	1036.07	0.44577
NA2	Syringe1	#N/A	490.813	5.36963	490.543	5.36668	-21.4592	0.0109403	#N/A	#N/A	#N/A	40278.6	40278.6	#N/A	#N/A	61	1024.36	0.418	11.1377	0.0058	1024.02	0.441	11.1339	0.006	-27.4939	0.292034	0.0108728	3.265e-06	0.024	0.003	1.522	0.011	1.578	0.002	1035.5	0.4238	1035.15	0.447
NA2	Syringe1	#N/A	491.002	5.37075	490.734	5.36781	-21.6322	0.0109383	#N/A	#N/A	#N/A	40278.8	40278.8	#N/A	#N/A	46	1024.17	0.556	11.1366	0.00652	1023.83	0.572	11.133	0.00674	-27.4031	0.388723	0.0108738	4.346e-06	0.023	0.002	1.559	0.015	1.577	0.001	1035.3	0.56252	1034.97	0.57874
NA2	Syringe1	#N/A	491.001	5.3702	490.736	5.3673	-21.7292	0.0109373	#N/A	#N/A	#N/A	40278.9	40278.9	#N/A	#N/A	50	1024.37	0.416	11.1398	0.00567	1023.94	0.44	11.1352	0.00592	-27.3192	0.348473	0.0108748	3.896e-06	0.03	0.004	1.564	0.014	1.577	0.002	1035.51	0.42167	1035.08	0.44592
NA2	Syringe1	#N/A	490.607	5.33827	490.339	5.33535	-26.7656	0.010881	#N/A	#N/A	#N/A	40279.6	40279.6	#N/A	#N/A	42	1023.93	0.646	11.1325	0.00728	1023.56	0.655	11.1285	0.00746	-27.5366	0.449455	0.0108723	5.025e-06	0.025	0.002	1.524	0.014	1.576	0.001	1035.06	0.65328	1034.69	0.66246
NA2	Syringe1	#N/A	490.688	5.33882	490.437	5.33609	-26.827	0.0108803	#N/A	#N/A	#N/A	40279.7	40279.7	#N/A	#N/A	50	1024.46	0.532	11.1417	0.00521	1024.15	0.544	11.1383	0.00535	-27.2399	0.417971	0.0108757	4.673e-06	0.022	0.002	1.525	0.01	1.579	0.002	1035.61	0.53721	1035.28	0.54935
NA2	Syringe1	#N/A	490.681	5.34406	490.445	5.34149	-25.8578	0.0108911	#N/A	#N/A	#N/A	40279.9	40279.9	#N/A	#N/A	35	1024.46	0.503	11.1519	0.00482	1024.13	0.509	11.1484	0.00487	-26.3418	0.288546	0.0108857	3.226e-06	0.022	0.002	1.559	0.011	1.577	0.001	1035.61	0.50782	1035.28	0.51387
NA2	Syringe1	#N/A	490.86	5.3414	490.6	5.33857	-26.6971	0.0108817	#N/A	#N/A	#N/A	40279.9	40279.9	#N/A	#N/A	41	1024.78	0.326	11.1452	0.00466	1024.43	0.33	11.1413	0.00476	-27.2427	0.281748	0.0108756	3.15e-06	0.024	0.002	1.553	0.007	1.577	0.001	1035.93	0.33066	1035.57	0.33476
NA2	Syringe1	#N/A	490.471	5.32254	490.222	5.31984	-29.3651	0.0108519	#N/A	#N/A	#N/A	40281.5	40281.5	#N/A	#N/A	41	1024.45	0.34	11.1401	0.00348	1024.2	0.343	11.1373	0.00353	-27.3733	0.346953	0.0108742	3.879e-06	0.017	0.001	1.518	0.005	1.578	0.001	1035.59	0.34348	1035.34	0.34653
NA2	Syringe1	#N/A	490.736	5.32772	490.49	5.32506	-28.9438	0.0108566	#N/A	#N/A	#N/A	40281.5	40281.5	#N/A	#N/A	45	1024.59	0.345	11.1415	0.00577	1024.29	0.359	11.1383	0.00592	-27.3747	0.305093	0.0108741	3.411e-06	0.021	0.002	1.52	0.008	1.578	0.001	1035.73	0.35077	1035.43	0.36492
NA2	Syringe1	#N/A	490.726	5.33008	490.493	5.32756	-28.4942	0.0108616	#N/A	#N/A	#N/A	40281.9	40281.9	#N/A	#N/A	41	1024.41	0.555	11.1457	0.00624	1024.1	0.559	11.1424	0.00634	-26.8358	0.395252	0.0108802	4.419e-06	0.021	0.002	1.542	0.013	1.579	0.002	1035.55	0.56124	1035.24	0.56534
NA2	Syringe1	#N/A	490.751	5.33081	490.526	5.32837	-28.4102	0.0108626	#N/A	#N/A	#N/A	40282	40282	#N/A	#N/A	40	1024.61	0.352	11.147	0.00592	1024.35	0.353	11.1441	0.00594	-26.9167	0.360101	0.0108793	4.026e-06	0.018	0.001	1.538	0.007	1.578	0.002	1035.75	0.35792	1035.49	0.35894
NA2	Syringe1	#N/A	490.56	5.36129	490.344	5.35892	-22.4765	0.0109289	#N/A	#N/A	#N/A	40283.6	40283.6	#N/A	#N/A	58	1023.43	0.351	11.1276	0.00457	1023.17	0.352	11.1248	0.00466	-27.4839	0.270657	0.0108729	3.026e-06	0.018	0.002	1.512	0.012	1.578	0.002	1034.56	0.35557	1034.29	0.35666
NA2	Syringe1	#N/A	490.529	5.3605	490.309	5.35809	-22.558	0.010928	#N/A	#N/A	#N/A	40283.7	40283.7	#N/A	#N/A	65	1024.5	0.565	11.1368	0.00514	1024.24	0.576	11.134	0.00526	-27.7013	0.395431	0.0108705	4.421e-06	0.018	0.002	1.521	0.021	1.576	0.002	1035.64	0.57014	1035.38	0.58126
NA2	Syringe1	#N/A	490.658	5.36138	490.392	5.35847	-22.6546	0.0109269	#N/A	#N/A	#N/A	40283.8	40283.8	#N/A	#N/A	65	1024.5	0.421	11.138	0.00465	1024.09	0.433	11.1335	0.00472	-27.6032	0.363053	0.0108716	4.059e-06	0.029	0.002	1.593	0.02	1.577	0.002	1035.64	0.42565	1035.23	0.43772
NA2	Syringe1	#N/A	490.742	5.36343	490.483	5.3606	-22.4493	0.0109292	#N/A	#N/A	#N/A	40283.9	40283.9	#N/A	#N/A	45	1024.37	0.525	11.1391	0.00632	1023.95	0.528	11.1345	0.00625	-27.3801	0.405986	0.0108741	4.539e-06	0.029	0.002	1.593	0.013	1.577	0.002	1035.51	0.53132	1035.08	0.53425
NA2	Syringe1	#N/A	490.605	5.34388	490.388	5.34152	-25.7387	0.0108924	#N/A	#N/A	#N/A	40285.4	40285.4	#N/A	#N/A	47	1023.93	0.449	11.1358	0.00494	1023.66	0.454	11.1328	0.00501	-27.2536	0.435323	0.0108755	4.867e-06	0.019	0.002	1.519	0.006	1.578	0.001	1035.07	0.45394	1034.79	0.45901
NA2	Syringe2	#N/A	490.64	5.34405	490.412	5.34158	-25.7768	0.010892	#N/A	#N/A	#N/A	40285.5	40285.5	#N/A	#N/A	46	1024.22	0.588	11.14	0.00566	1023.88	0.598	11.1363	0.00582	-27.1537	0.337024	0.0108766	3.768e-06	0.024	0.002	1.534	0.014	1.577	0.003	1035.36	0.59366	1035.01	0.60382
NA2	Syringe1	#N/A	490.668	5.34659	490.445	5.34415	-25.3712	0.0108965	#N/A	#N/A	#N/A	40285.7	40285.7	#N/A	#N/A	53	1024.45	0.677	11.1442	0.00559	1024.15	0.693	11.141	0.00576	-27.0091	0.40044	0.0108782	4.477e-06	0.021	0.002	1.529	0.014	1.576	0.002	1035.6	0.68259	1035.3	0.69876
NA2	Syringe1	#N/A	490.607	5.34966	490.395	5.34735	-24.6884	0.0109042	#N/A	#N/A	#N/A	40285.9	40285.9	#N/A	#N/A	40	1024.42	0.286	11.1479	0.00413	1024.14	0.282	11.1447	0.00417	-26.6661	0.288277	0.0108821	3.223e-06	0.02	0.001	1.562	0.01	1.578	0.001	1035.57	0.29013	1035.28	0.28617
NA2	Syringe1	#N/A	489.844	5.30055	489.576	5.29765	-32.1382	0.0108209	#N/A	#N/A	#N/A	40287.7	40287.7	#N/A	#N/A	39	1023.54	0.544	11.1304	0.00586	1023.23	0.551	11.127	0.00593	-27.3494	0.38926	0.0108744	4.352e-06	0.021	0.001	1.52	0.006	1.577	0.001	1034.67	0.54986	1034.35	0.55693
NA2	Syringe1	#N/A	490.001	5.30274	489.649	5.29894	-32.0465	0.0108219	#N/A	#N/A	#N/A	40287.8	40287.8	#N/A	#N/A	43	1024.48	0.48	11.1423	0.00495	1024	0.493	11.1371	0.0051	-27.2048	0.350441	0.010876	3.918e-06	0.034	0.003	1.527	0.009	1.577	0.002	1035.63	0.48495	1035.14	0.4981
NA2	Syringe1	#N/A	490.084	5.30844	489.814	5.30551	-31.1721	0.0108317	#N/A	#N/A	#N/A	40287.9	40287.9	#N/A	#N/A	44	1024.47	0.617	11.1473	0.00466	1023.87	0.619	11.1408	0.00486	-26.7569	0.46484	0.0108811	5.197e-06	0.041	0.003	1.592	0.013	1.576	0.001	1035.62	0.62166	1035.02	0.62386
NA2	Syringe1	#N/A	491.02	5.34691	490.805	5.34456	-26.0113	0.0108894	#N/A	#N/A	#N/A	40288.6	40288.6	#N/A	#N/A	47	1023.38	0.396	11.1287	0.00364	1022.96	0.403	11.1242	0.00359	-27.3409	0.362158	0.0108745	4.049e-06	0.029	0.002	1.522	0.009	1.578	0.001	1034.5	0.39964	1034.09	0.40659
NA2	Syringe1	#N/A	491.23	5.35042	490.952	5.3474	-25.7869	0.0108919	#N/A	#N/A	#N/A	40288.8	40288.8	#N/A	#N/A	53	1024.54	0.678	11.1442	0.00561	1024.03	0.688	11.1387	0.00579	-27.0924	0.438454	0.0108773	4.902e-06	0.035	0.003	1.541	0.012	1.576	0.001	1035.69	0.68361	1035.17	0.69379
NA2	Syringe1	#N/A	491.16	5.35302	490.932	5.35054	-25.1743	0.0108987	#N/A	#N/A	#N/A	40288.8	40288.8	#N/A	#N/A	45	1024.53	0.501	11.1478	0.0058	1024.03	0.515	11.1424	0.006	-26.7704	0.30724	0.0108809	3.435e-06	0.034	0.002	1.587	0.016	1.578	0.002	1035.68	0.5068	1035.17	0.521
NA2	Syringe1	#N/A	491.141	5.35182	490.935	5.34958	-25.3568	0.0108967	#N/A	#N/A	#N/A	40288.9	40288.9	#N/A	#N/A	35	1024.72	0.44	11.1498	0.00527	1024.36	0.441	11.1457	0.0054	-26.7853	0.392211	0.0108807	4.385e-06	0.025	0.001	1.584	0.026	1.577	0.001	1035.87	0.44527	1035.5	0.4464
NA2	Syringe1	#N/A	490.837	5.42879	490.608	5.42627	-10.7255	0.0110603	#N/A	#N/A	#N/A	40289.7	40289.7	#N/A	#N/A	40	1024.35	0.368	11.1378	0.00551	1023.91	0.379	11.133	0.00558	-27.4684	0.30885	0.0108731	3.453e-06	0.03	0.002	1.515	0.006	1.577	0.002	1035.48	0.37351	1035.04	0.38458
NA2	Syringe1	#N/A	491.111	5.4347	490.888	5.43222	-10.2033	0.0110661	#N/A	#N/A	#N/A	40289.8	40289.8	#N/A	#N/A	45	1024.49	0.52	11.1428	0.00524	1024.02	0.517	11.1377	0.00527	-27.1656	0.325665	0.0108765	3.641e-06	0.033	0.001	1.57	0.011	1.577	0.002	1035.63	0.52524	1035.15	0.52227
NA2	Syringe1	#N/A	491.057	5.43572	490.828	5.43318	-9.90799	0.0110694	#N/A	#N/A	#N/A	40289.9	40289.9	#N/A	#N/A	45	1024.65	0.646	11.1449	0.00576	1024.16	0.654	11.1396	0.00576	-27.1308	0.388365	0.0108769	4.342e-06	0.034	0.002	1.517	0.011	1.577	0.002	1035.79	0.65176	1035.3	0.65976
NA2	Syringe1	#N/A	490.819	5.37909	490.641	5.37715	-19.746	0.0109594	#N/A	#N/A	#N/A	40290.5	40290.5	#N/A	#N/A	38	1024.33	0.359	11.138	0.00487	1023.84	0.368	11.1326	0.00488	-27.4422	0.209299	0.0108734	2.34e-06	0.034	0.002	1.522	0.011	1.578	0.002	1035.47	0.36387	1034.98	0.37288
NA2	Syringe1	#N/A	490.811	5.37824	490.638	5.37635	-19.8864	0.0109579	#N/A	#N/A	#N/A	40290.6	40290.6	#N/A	#N/A	47	1024.44	0.577	11.138	0.00568	1024.01	0.585	11.1333	0.00579	-27.543	0.369582	0.0108723	4.132e-06	0.03	0.002	1.522	0.008	1.577	0.002	1035.58	0.58268	1035.14	0.59079
NA2	Syringe1	#N/A	490.794	5.3838	490.595	5.38161	-18.8406	0.0109696	#N/A	#N/A	#N/A	40291	40291	#N/A	#N/A	51	1024.24	0.452	11.1471	0.00597	1023.56	0.457	11.1397	0.00597	-26.5594	0.421728	0.0108833	4.715e-06	0.047	0.002	1.556	0.014	1.576	0.001	1035.39	0.45797	1034.7	0.46297
NA2	Syringe1	#N/A	491.306	5.34868	490.959	5.3449	-26.256	0.0108867	#N/A	#N/A	#N/A	40292.5	40292.5	#N/A	#N/A	54	1023.14	0.432	11.1252	0.00438	1022.59	0.444	11.1192	0.00448	-27.4257	0.325844	0.0108736	3.643e-06	0.038	0.002	1.525	0.013	1.577	0.002	1034.26	0.43638	1033.71	0.44848
NA2	Syringe1	#N/A	491.252	5.34971	490.772	5.34448	-25.9608	0.01089	#N/A	#N/A	#N/A	40292.6	40292.6	#N/A	#N/A	41	1024.65	0.518	11.1402	0.00581	1024.09	0.527	11.134	0.00584	-27.5524	0.42772	0.0108722	4.782e-06	0.039	0.003	1.543	0.01	1.576	0.001	1035.79	0.52381	1035.22	0.53284
NA2	Syringe1	#N/A	491.479	5.35236	490.987	5.34701	-25.9287	0.0108903	#N/A	#N/A	#N/A	40292.8	40292.8	#N/A	#N/A	48	1024.82	0.607	11.1438	0.00601	1023.54	0.625	11.1299	0.0063	-27.3957	0.383177	0.0108739	4.284e-06	0.089	0.004	1.588	0.023	1.575	0.001	1035.97	0.61301	1034.67	0.6313
NA2	Syringe1	#N/A	491.407	5.35102	491.055	5.34718	-26.0297	0.0108892	#N/A	#N/A	#N/A	40292.9	40292.9	#N/A	#N/A	44	1024.57	0.426	11.1403	0.00541	1023.99	0.436	11.134	0.00549	-27.4602	0.349547	0.0108732	3.908e-06	0.04	0.002	1.528	0.011	1.577	0.003	1035.71	0.43141	1035.12	0.44149
NA2	Syringe1	#N/A	489.267	5.30008	488.888	5.29597	-31.0837	0.0108327	#N/A	#N/A	#N/A	40294.7	40294.7	#N/A	#N/A	53	1024.4	0.517	11.1358	0.00486	1024.05	0.521	11.132	0.00494	-27.7004	0.449276	0.0108705	5.023e-06	0.024	0.002	1.518	0.007	1.577	0.003	1035.54	0.52186	1035.19	0.52594
NA2	Syringe1	#N/A	489.357	5.30183	488.945	5.29736	-30.9407	0.0108343	#N/A	#N/A	#N/A	40294.8	40294.8	#N/A	#N/A	55	1024.39	0.424	11.1384	0.00449	1023.91	0.433	11.1332	0.00469	-27.4605	0.365468	0.0108732	4.086e-06	0.033	0.003	1.525	0.011	1.576	0.002	1035.53	0.42849	1035.05	0.43769
NA2	Syringe1	#N/A	489.502	5.3076	489.117	5.30341	-30.1748	0.0108428	#N/A	#N/A	#N/A	40294.8	40294.8	#N/A	#N/A	37	1024.27	0.452	11.141	0.00519	1023.41	0.494	11.1317	0.00538	-27.1122	0.433982	0.0108771	4.852e-06	0.06	0.006	1.578	0.013	1.576	0.002	1035.41	0.45719	1034.54	0.49938
NA2	Syringe1	#N/A	490.169	5.38918	489.903	5.38626	-16.6058	0.0109945	#N/A	#N/A	#N/A	40295.6	40295.6	#N/A	#N/A	41	1024.25	0.452	11.1368	0.00564	1023.87	0.452	11.1327	0.00571	-27.4631	0.344001	0.0108732	3.846e-06	0.026	0.001	1.522	0.013	1.576	0.001	1035.38	0.45764	1035	0.45771
NA2	Syringe1	#N/A	490.146	5.39058	489.788	5.38664	-16.305	0.0109979	#N/A	#N/A	#N/A	40295.7	40295.7	#N/A	#N/A	45	1024.67	0.42	11.1405	0.006	1024.15	0.431	11.1347	0.00611	-27.55	0.304825	0.0108722	3.408e-06	0.037	0.003	1.538	0.011	1.577	0.002	1035.82	0.426	1035.28	0.43711
NA2	Syringe1	#N/A	490.142	5.38994	489.867	5.38691	-16.4141	0.0109967	#N/A	#N/A	#N/A	40295.8	40295.8	#N/A	#N/A	53	1024.74	0.463	11.1402	0.00539	1024.35	0.482	11.136	0.00561	-27.6302	0.459473	0.0108713	5.137e-06	0.027	0.002	1.563	0.014	1.578	0.002	1035.88	0.46839	1035.48	0.48761
NA2	Syringe1	#N/A	490.126	5.3887	489.856	5.38573	-16.6071	0.0109945	#N/A	#N/A	#N/A	40295.9	40295.9	#N/A	#N/A	35	1024.56	0.524	11.139	0.00458	1024.15	0.527	11.1346	0.00461	-27.563	0.464482	0.010872	5.193e-06	0.028	0.001	1.569	0.023	1.578	0.001	1035.69	0.52858	1035.28	0.53161
NA2	Syringe1	#N/A	490.543	5.38493	490.276	5.38199	-18.133	0.0109775	#N/A	#N/A	#N/A	40297.4	40297.4	#N/A	#N/A	42	1023.54	0.508	11.1273	0.00551	1023.17	0.517	11.1232	0.00559	-27.6246	0.378169	0.0108714	4.228e-06	0.026	0.001	1.522	0.01	1.577	0.002	1034.67	0.51351	1034.29	0.52259
NA2	Syringe1	#N/A	490.578	5.3881	490.222	5.38418	-17.624	0.0109832	#N/A	#N/A	#N/A	40297.5	40297.5	#N/A	#N/A	52	1023.88	0.655	11.1305	0.00642	1023.35	0.673	11.1247	0.00668	-27.6668	0.474321	0.0108709	5.303e-06	0.037	0.003	1.527	0.018	1.577	0.001	1035.01	0.66142	1034.48	0.67968
NA2	Syringe1	#N/A	490.699	5.38727	490.209	5.38189	-18.0175	0.0109788	#N/A	#N/A	#N/A	40297.6	40297.6	#N/A	#N/A	43	1024.75	0.455	11.1397	0.00581	1023.55	0.525	11.1267	0.00674	-27.6864	0.346505	0.0108707	3.874e-06	0.083	0.009	1.574	0.015	1.577	0.002	1035.89	0.46081	1034.68	0.53174
NA2	Syringe1	#N/A	490.719	5.34834	490.467	5.3456	-25.1518	0.010899	#N/A	#N/A	#N/A	40300.6	40300.6	#N/A	#N/A	54	1024.21	0.501	11.1356	0.00549	1023.95	0.52	11.1328	0.00564	-27.528	0.313322	0.0108724	3.503e-06	0.018	0.002	1.493	0.011	1.578	0.002	1035.35	0.50649	1035.08	0.52564
NA2	Syringe1	#N/A	490.327	5.34203	490.072	5.33926	-25.5233	0.0108948	#N/A	#N/A	#N/A	40300.7	40300.7	#N/A	#N/A	44	1024.41	0.584	11.1369	0.00576	1024.1	0.594	11.1334	0.00585	-27.616	0.399009	0.0108714	4.461e-06	0.022	0.002	1.52	0.008	1.578	0.002	1035.55	0.58976	1035.23	0.59985
NA2	Syringe1	#N/A	490.374	5.35034	490.078	5.34711	-24.1021	0.0109107	#N/A	#N/A	#N/A	40301	40301	#N/A	#N/A	48	1024.09	0.52	11.142	0.00534	1023.68	0.534	11.1376	0.0055	-26.8578	0.338545	0.0108799	3.785e-06	0.028	0.002	1.524	0.008	1.578	0.002	1035.23	0.52534	1034.82	0.5395
NA2	Syringe1	#N/A	491.166	5.34231	490.908	5.3395	-27.138	0.0108768	#N/A	#N/A	#N/A	40301.7	40301.7	#N/A	#N/A	51	1024.13	0.552	11.1367	0.00439	1023.82	0.556	11.1333	0.00445	-27.36	0.415019	0.0108743	4.64e-06	0.022	0.001	1.506	0.01	1.577	0.002	1035.27	0.55639	1034.95	0.56045
NA2	Syringe1	#N/A	491.051	5.33813	490.722	5.33454	-27.6725	0.0108708	#N/A	#N/A	#N/A	40301.8	40301.8	#N/A	#N/A	46	1024.39	0.587	11.1385	0.00525	1024.03	0.6	11.1346	0.0054	-27.4474	0.455895	0.0108733	5.097e-06	0.025	0.002	1.52	0.006	1.578	0.002	1035.53	0.59225	1035.17	0.6054
NA2	Syringe1	#N/A	491.271	5.34317	490.856	5.33866	-27.1888	0.0108762	#N/A	#N/A	#N/A	40302	40302	#N/A	#N/A	47	1024.53	0.565	11.1436	0.00531	1023.04	0.75	11.1274	0.00788	-27.139	0.434608	0.0108768	4.859e-06	0.103	0.028	1.563	0.017	1.577	0.001	1035.67	0.57031	1034.17	0.75788
NA2	Syringe1	#N/A	491.124	5.34053	490.928	5.3384	-27.3792	0.0108741	#N/A	#N/A	#N/A	40302.1	40302.1	#N/A	#N/A	42	1024.2	0.426	11.1381	0.00526	1023.83	0.432	11.134	0.00533	-27.3062	0.279244	0.0108749	3.122e-06	0.026	0.001	1.521	0.007	1.578	0.001	1035.34	0.43126	1034.96	0.43733
NA2	Syringe1	#N/A	491.22	5.34323	490.966	5.34047	-27.0763	0.0108775	#N/A	#N/A	#N/A	40302.5	40302.5	#N/A	#N/A	43	1023.9	0.601	11.1371	0.00581	1023.53	0.604	11.133	0.00578	-27.1124	0.429241	0.0108771	4.799e-06	0.026	0.001	1.513	0.01	1.577	0.002	1035.04	0.60681	1034.66	0.60978
NA2	Syringe1	#N/A	491.178	5.34826	490.938	5.34564	-26.0795	0.0108886	#N/A	#N/A	#N/A	40302.7	40302.7	#N/A	#N/A	43	1023.99	0.466	11.137	0.00526	1023.62	0.471	11.133	0.0053	-27.2005	0.261355	0.0108761	2.922e-06	0.025	0.001	1.517	0.011	1.578	0.001	1035.12	0.47126	1034.75	0.4763
NA2	Stiff syringe1	#N/A	490.957	5.34574	490.68	5.34273	-26.0981	0.0108884	#N/A	#N/A	#N/A	40302.9	40302.9	#N/A	#N/A	71	1024.23	0.563	11.1382	0.00733	1023.77	0.572	11.1332	0.00743	-27.3226	0.370655	0.0108747	4.144e-06	0.032	0.001	1.521	0.013	1.577	0.002	1035.37	0.57033	1034.9	0.57943
NA2	Syringe1	#N/A	491.106	5.34761	490.885	5.34521	-26.0535	0.0108889	#N/A	#N/A	#N/A	40303.1	40303.1	#N/A	#N/A	38	1024.15	0.619	11.1397	0.00476	1023.82	0.624	11.136	0.00481	-27.1261	0.314306	0.0108769	3.514e-06	0.023	0.001	1.551	0.008	1.577	0.001	1035.29	0.62376	1034.95	0.62881
NA2	Syringe1	#N/A	491.082	5.37328	490.928	5.37161	-21.3298	0.0109417	#N/A	#N/A	#N/A	40303.7	40303.7	#N/A	#N/A	36	1024.06	0.52	11.1391	0.00606	1023.65	0.523	11.1347	0.0061	-27.079	0.519758	0.0108775	5.811e-06	0.028	0	1.529	0.008	1.578	0.001	1035.2	0.52606	1034.79	0.5291
NA2	Syringe1	#N/A	490.992	5.37668	490.772	5.37427	-20.5324	0.0109506	#N/A	#N/A	#N/A	40303.9	40303.9	#N/A	#N/A	36	1023.68	0.489	11.1377	0.004	1022.99	0.492	11.1302	0.00408	-26.8479	0.42781	0.01088	4.783e-06	0.048	0.001	1.573	0.007	1.576	0.001	1034.82	0.493	1034.12	0.49608
NA2	Syringe1	#N/A	491.064	5.37413	490.802	5.37127	-21.1386	0.0109439	#N/A	#N/A	#N/A	40304	40304	#N/A	#N/A	43	1024.21	0.317	11.1358	0.00504	1023.36	0.319	11.1265	0.0051	-27.5121	0.406343	0.0108726	4.543e-06	0.059	0.001	1.578	0.014	1.577	0.001	1035.34	0.32204	1034.48	0.3241
NA2	Syringe1	#N/A	490.786	5.33481	490.512	5.33183	-27.7514	0.0108699	#N/A	#N/A	#N/A	40304.7	40304.7	#N/A	#N/A	47	1023.59	0.419	11.1293	0.00527	1023.11	0.427	11.1241	0.00536	-27.4947	0.33765	0.0108728	3.775e-06	0.033	0.002	1.515	0.008	1.578	0.002	1034.72	0.42427	1034.23	0.43236
NA2	Syringe1	#N/A	490.801	5.33794	490.526	5.33495	-27.2112	0.010876	#N/A	#N/A	#N/A	40304.8	40304.8	#N/A	#N/A	36	1023.95	0.447	11.1368	0.00445	1023.39	0.453	11.1307	0.00451	-27.1838	0.352409	0.0108763	3.94e-06	0.039	0.001	1.542	0.014	1.577	0.001	1035.09	0.45145	1034.52	0.45751
NA2	Syringe1	#N/A	490.712	5.33643	490.407	5.33311	-27.3087	0.0108749	#N/A	#N/A	#N/A	40305	40305	#N/A	#N/A	29	1023.91	0.248	11.1332	0.00416	1023.3	0.251	11.1265	0.00424	-27.4609	0.273519	0.0108732	3.058e-06	0.042	0.001	1.542	0.009	1.577	0.001	1035.04	0.25216	1034.43	0.25524
NA2	Syringe1	#N/A	490.478	5.32779	490.179	5.32454	-28.4215	0.0108624	#N/A	#N/A	#N/A	40305.8	40305.8	#N/A	#N/A	43	1022.61	0.41	11.1193	0.00431	1022.01	0.419	11.1129	0.00451	-27.4338	0.432908	0.0108735	4.84e-06	0.041	0.002	1.532	0.009	1.577	0.002	1033.73	0.41431	1033.13	0.42351
NA2	Syringe1	#N/A	490.518	5.32728	490.257	5.32445	-28.5933	0.0108605	#N/A	#N/A	#N/A	40306.6	40306.6	#N/A	#N/A	40	1023.37	0.299	11.1286	0.00416	1022.92	0.302	11.1237	0.00423	-27.3462	0.216186	0.0108745	2.417e-06	0.032	0.002	1.535	0.006	1.577	0.002	1034.5	0.30316	1034.04	0.30623
NA2	Syringe1	#N/A	490.512	5.32868	490.303	5.32641	-28.3255	0.0108635	#N/A	#N/A	#N/A	40306.7	40306.7	#N/A	#N/A	43	1024.06	0.526	11.1363	0.0052	1023.51	0.531	11.1302	0.00525	-27.334	0.513944	0.0108746	5.746e-06	0.039	0.001	1.568	0.012	1.576	0.001	1035.2	0.5312	1034.64	0.53625
NA2	Syringe1	#N/A	491.021	5.37089	490.727	5.36767	-21.6439	0.0109382	#N/A	#N/A	#N/A	40306.8	40306.8	#N/A	#N/A	36	1024.1	0.351	11.1369	0.00386	1023.58	0.357	11.1312	0.00394	-27.3186	0.258045	0.0108748	2.885e-06	0.036	0.001	1.544	0.007	1.577	0.001	1035.24	0.35486	1034.71	0.36094
NA2	Syringe1	#N/A	491.181	5.38266	490.877	5.37932	-19.8209	0.0109586	#N/A	#N/A	#N/A	40307.8	40307.8	#N/A	#N/A	43	1023.59	0.35	11.132	0.00421	1023.08	0.349	11.1265	0.00419	-27.2597	0.337382	0.0108754	3.772e-06	0.035	0.002	1.538	0.012	1.577	0.002	1034.73	0.35421	1034.21	0.35319
NA2	Syringe1	#N/A	491.254	5.38429	490.992	5.38142	-19.6688	0.0109603	#N/A	#N/A	#N/A	40307.9	40307.9	#N/A	#N/A	35	1023.54	0.326	11.1314	0.00404	1022.98	0.335	11.1253	0.00407	-27.2589	0.306882	0.0108754	3.431e-06	0.039	0.001	1.557	0.008	1.577	0.001	1034.67	0.33004	1034.1	0.33907
NA2	Syringe1	#N/A	490.811	5.33859	490.536	5.3356	-27.1116	0.0108771	#N/A	#N/A	#N/A	40308.7	40308.7	#N/A	#N/A	37	1025.59	0.368	11.1536	0.00398	1025.11	0.374	11.1484	0.00414	-27.2734	0.288009	0.0108753	3.22e-06	0.033	0.002	1.535	0.003	1.577	0.001	1036.74	0.37198	1036.26	0.37814
NA2	Syringe1	#N/A	490.73	5.34127	490.4	5.33768	-26.4633	0.0108843	#N/A	#N/A	#N/A	40309.1	40309.1	#N/A	#N/A	35	1022.88	0.387	11.1301	0.00485	1020.82	0.411	11.1078	0.00574	-26.7459	0.443641	0.0108812	4.96e-06	0.142	0.009	1.582	0.013	1.575	0.001	1034.01	0.39185	1031.93	0.41674
NA2	Syringe1	#N/A	491.223	5.34322	491.043	5.34127	-27.0843	0.0108774	#N/A	#N/A	#N/A	40309.1	40309.1	#N/A	#N/A	32	1024.51	0.341	11.1471	0.00646	1023.87	0.348	11.1401	0.00656	-26.8117	0.316989	0.0108804	3.544e-06	0.045	0.001	1.524	0.009	1.577	0.001	1035.66	0.34746	1035.01	0.35456
NA2	Syringe1	#N/A	490.608	5.32183	490.474	5.32037	-29.7659	0.0108474	#N/A	#N/A	#N/A	40309.9	40309.9	#N/A	#N/A	29	1024.01	0.399	11.1366	0.00494	1023.64	0.406	11.1326	0.00503	-27.2599	0.357865	0.0108754	4.001e-06	0.025	0.001	1.523	0.014	1.577	0.001	1035.15	0.40394	1034.78	0.41103
NA2	Syringe1	#N/A	490.638	5.32099	490.41	5.31853	-29.9765	0.0108451	#N/A	#N/A	#N/A	40310.5	40310.5	#N/A	#N/A	33	1022.7	0.327	11.1211	0.00458	1022.2	0.329	11.1157	0.00464	-27.363	0.340155	0.0108743	3.803e-06	0.034	0.001	1.52	0.007	1.577	0.001	1033.82	0.33158	1033.32	0.33364
NA2	Syringe1	#N/A	490.595	5.30451	490.341	5.30176	-32.8978	0.0108124	#N/A	#N/A	#N/A	40310.6	40310.7	#N/A	#N/A	35	1023.88	0.51	11.1319	0.00391	1023.42	0.512	11.1269	0.00392	-27.5451	0.290782	0.0108722	3.251e-06	0.032	0.001	1.526	0.015	1.577	0.001	1035.01	0.51391	1034.55	0.51592
NA2	Syringe1	#N/A	490.464	5.30632	490.26	5.3041	-32.3098	0.010819	#N/A	#N/A	#N/A	40310.7	40310.7	#N/A	#N/A	57	1024.48	0.418	11.1408	0.00463	1024.1	0.422	11.1366	0.00465	-27.3349	0.379063	0.0108746	4.238e-06	0.026	0.001	1.519	0.011	1.578	0.001	1035.62	0.42263	1035.23	0.42665
NA2	Syringe1	#N/A	490.744	5.30687	490.441	5.30359	-32.7616	0.0108139	#N/A	#N/A	#N/A	40311	40311	#N/A	#N/A	29	1023.9	0.373	11.133	0.00374	1023.35	0.375	11.127	0.00375	-27.4665	0.287651	0.0108731	3.216e-06	0.038	0.001	1.56	0.01	1.578	0.001	1035.03	0.37674	1034.48	0.37875
NA2	Syringe1	#N/A	491.417	5.34991	491.272	5.34833	-26.252	0.0108867	#N/A	#N/A	#N/A	40311.5	40311.5	#N/A	#N/A	27	1023.91	0.396	11.134	0.004	1023.57	0.394	11.1302	0.00404	-27.3957	0.394358	0.0108739	4.409e-06	0.024	0.001	1.524	0.007	1.577	0.001	1035.05	0.4	1034.7	0.39804
NA2	Syringe1	#N/A	491.411	5.35177	491.172	5.34917	-25.901	0.0108906	#N/A	#N/A	#N/A	40311.9	40311.9	#N/A	#N/A	32	1024.13	0.336	11.1382	0.00376	1022.95	0.353	11.1253	0.0041	-27.2309	0.392837	0.0108758	4.392e-06	0.082	0.005	1.555	0.011	1.576	0.001	1035.27	0.33976	1034.07	0.3571
NA2	Syringe1	#N/A	490.891	5.31484	490.79	5.31375	-31.598	0.0108269	#N/A	#N/A	#N/A	40312	40312	#N/A	#N/A	37	1023.94	0.472	11.1332	0.00494	1023.4	0.473	11.1274	0.00496	-27.4811	0.40205	0.010873	4.495e-06	0.037	0	1.525	0.013	1.577	0.001	1035.07	0.47694	1034.53	0.47796
NA2	Syringe1	#N/A	490.793	5.3141	490.609	5.31211	-31.5401	0.0108276	#N/A	#N/A	#N/A	40312.6	40312.6	#N/A	#N/A	40	1023.72	0.417	11.1284	0.00524	1023.35	0.42	11.1244	0.00529	-27.693	0.393195	0.0108706	4.396e-06	0.026	0.001	1.517	0.009	1.578	0.001	1034.85	0.42224	1034.47	0.42529
NA2	Syringe1	#N/A	490.849	5.31112	490.679	5.30929	-32.1924	0.0108203	#N/A	#N/A	#N/A	40312.9	40312.9	#N/A	#N/A	33	1024.29	0.371	11.1484	0.00369	1019.42	0.403	11.0953	0.00375	-26.4932	0.410011	0.010884	4.584e-06	0.335	0.008	1.573	0.013	1.572	0.001	1035.44	0.37469	1030.51	0.40675
NA2	Syringe1	#N/A	490.727	5.30051	490.468	5.29771	-33.8862	0.0108013	#N/A	#N/A	#N/A	40313.6	40313.6	#N/A	#N/A	37	1023.53	0.545	11.1296	0.00409	1023.1	0.548	11.1249	0.0041	-27.412	0.426289	0.0108737	4.766e-06	0.03	0.001	1.519	0.011	1.577	0.001	1034.66	0.54909	1034.23	0.5521
NA2	Syringe1	#N/A	491.26	5.30973	490.94	5.30627	-33.256	0.0108084	#N/A	#N/A	#N/A	40313.7	40313.7	#N/A	#N/A	50	1024.52	0.387	11.1436	0.00499	1021.93	0.597	11.1155	0.00738	-27.1252	0.337114	0.0108769	3.769e-06	0.178	0.024	1.556	0.018	1.575	0.001	1035.66	0.39199	1033.05	0.60438
NA2	Syringe1	#N/A	490.604	5.29042	490.392	5.28813	-35.4844	0.0107835	#N/A	#N/A	#N/A	40313.9	40313.9	#N/A	#N/A	31	1024.14	0.415	11.1381	0.00431	1023.73	0.413	11.1336	0.00429	-27.2522	0.359385	0.0108755	4.018e-06	0.028	0.001	1.532	0.008	1.577	0.001	1035.28	0.41931	1034.87	0.41729
NA2	Syringe1	#N/A	490.718	5.29108	490.527	5.28902	-35.5883	0.0107823	#N/A	#N/A	#N/A	40314.7	40314.7	#N/A	#N/A	36	1023.83	0.255	11.1345	0.00459	1023.45	0.254	11.1304	0.00462	-27.2654	0.318778	0.0108754	3.564e-06	0.026	0.001	1.523	0.014	1.578	0.001	1034.96	0.25959	1034.58	0.25862
NA2	Syringe1	#N/A	491.375	5.38365	491.179	5.3815	-20.0265	0.0109563	#N/A	#N/A	#N/A	40315.7	40315.7	#N/A	#N/A	62	1023.73	0.562	11.1314	0.00654	1023.31	0.56	11.1269	0.00647	-27.4411	0.448561	0.0108734	5.015e-06	0.029	0.001	1.517	0.014	1.577	0.001	1034.86	0.56854	1034.44	0.56647
NA2	Syringe1	#N/A	491.898	5.39047	491.774	5.38911	-19.8284	0.0109585	#N/A	#N/A	#N/A	40315.9	40315.9	#N/A	#N/A	32	1024.06	0.434	11.1347	0.00547	1023.73	0.434	11.1312	0.00553	-27.4633	0.397757	0.0108732	4.447e-06	0.022	0.001	1.531	0.01	1.577	0.001	1035.19	0.43947	1034.86	0.43953
NA2	Syringe1	#N/A	491.312	5.34181	491.163	5.34019	-27.5184	0.0108725	#N/A	#N/A	#N/A	40316.1	40316.1	#N/A	#N/A	35	1024.07	0.343	11.1369	0.00443	1023.7	0.349	11.1329	0.00441	-27.288	0.289887	0.0108751	3.241e-06	0.025	0.001	1.539	0.011	1.578	0.001	1035.21	0.34743	1034.84	0.35341
NA2	Syringe1	#N/A	491.548	5.34828	491.378	5.34644	-26.8072	0.0108805	#N/A	#N/A	#N/A	40316.9	40316.9	#N/A	#N/A	33	1023.98	0.558	11.138	0.00368	1023.51	0.558	11.133	0.00366	-27.1004	0.368956	0.0108772	4.125e-06	0.032	0.001	1.525	0.015	1.577	0.001	1035.11	0.56168	1034.65	0.56166
NA2	Syringe1	#N/A	490.878	5.31691	490.598	5.31389	-31.1948	0.0108314	#N/A	#N/A	#N/A	40317.8	40317.8	#N/A	#N/A	25	1023.86	0.421	11.1313	0.00509	1023.35	0.422	11.1258	0.0051	-27.5785	0.60464	0.0108719	6.76e-06	0.035	0.001	1.548	0.013	1.578	0	1034.99	0.42609	1034.48	0.4271
NA2	Syringe1	#N/A	490.997	5.31907	490.808	5.31702	-31.0369	0.0108332	#N/A	#N/A	#N/A	40318.5	40318.5	#N/A	#N/A	31	1023.66	0.445	11.1296	0.00409	1023.16	0.454	11.1243	0.00412	-27.5308	0.280675	0.0108724	3.138e-06	0.034	0.001	1.531	0.013	1.577	0.001	1034.79	0.44909	1034.29	0.45812
NA2	Syringe1	#N/A	491.871	5.36515	491.585	5.36203	-24.38	0.0109076	#N/A	#N/A	#N/A	40319	40319	#N/A	#N/A	38	1023.86	0.356	11.1316	0.00381	1023.23	0.359	11.1248	0.00386	-27.5458	0.329869	0.0108722	3.688e-06	0.044	0.002	1.543	0.01	1.577	0.001	1034.99	0.35981	1034.35	0.36286
NA2	Syringe1	#N/A	492.181	5.36911	491.848	5.36548	-24.2736	0.0109088	#N/A	#N/A	#N/A	40319.7	40319.7	#N/A	#N/A	33	1024.24	0.315	11.1396	0.00398	1022.73	0.443	11.1232	0.00501	-27.2127	0.306256	0.010876	3.424e-06	0.104	0.015	1.589	0.003	1.576	0.001	1035.38	0.31898	1033.85	0.44801
NA2	Syringe1	#N/A	491.035	5.31399	490.812	5.31158	-32.0367	0.010822	#N/A	#N/A	#N/A	40319.9	40319.9	#N/A	#N/A	29	1024	0.389	11.1338	0.0045	1023.52	0.392	11.1285	0.00458	-27.4971	0.379152	0.0108728	4.239e-06	0.033	0.001	1.54	0.007	1.578	0.001	1035.14	0.3935	1034.65	0.39658
NA2	Syringe1	#N/A	490.236	5.29344	490.011	5.29101	-34.2083	0.0107977	#N/A	#N/A	#N/A	40322.8	40322.8	#N/A	#N/A	44	1023.01	0.406	11.1215	0.00337	1022.56	0.409	11.1166	0.00336	-27.6243	0.34087	0.0108714	3.811e-06	0.031	0.001	1.52	0.011	1.577	0.001	1034.13	0.40937	1033.67	0.41236
NA2	Syringe1	#N/A	490.922	5.29887	490.6	5.2954	-34.5683	0.0107937	#N/A	#N/A	#N/A	40323	40323	#N/A	#N/A	43	1024.06	0.55	11.1316	0.00507	1020	1.272	11.0875	0.01504	-27.7377	0.347221	0.0108701	3.882e-06	0.279	0.103	1.581	0.011	1.573	0.002	1035.19	0.55507	1031.09	1.28704
NA2	Syringe1	#N/A	490.244	5.31206	490.079	5.31028	-30.8259	0.0108356	#N/A	#N/A	#N/A	40323.1	40323.1	#N/A	#N/A	32	1024.18	0.288	11.1331	0.00369	1023.68	0.291	11.1277	0.0037	-27.7172	0.285594	0.0108703	3.193e-06	0.034	0.001	1.526	0.01	1.577	0.001	1035.31	0.29169	1034.81	0.2947
NA2	Syringe1	#N/A	490.538	5.31479	490.333	5.31256	-30.9119	0.0108346	#N/A	#N/A	#N/A	40323.9	40323.9	#N/A	#N/A	46	1024.14	0.579	11.1355	0.0051	1023.66	0.583	11.1302	0.0051	-27.4804	0.363858	0.010873	4.068e-06	0.034	0.002	1.533	0.012	1.577	0.002	1035.28	0.5841	1034.79	0.5881
NA2	Syringe1	#N/A	490.726	5.28929	490.381	5.28557	-35.9305	0.0107785	#N/A	#N/A	#N/A	40325.8	40325.8	#N/A	#N/A	33	1023.95	0.371	11.1348	0.00369	1021.24	0.692	11.1054	0.00854	-27.3487	0.298206	0.0108744	3.334e-06	0.187	0.041	1.534	0.006	1.575	0.001	1035.08	0.37469	1032.35	0.70054
NA2	Syringe1	#N/A	490.827	5.28901	490.552	5.28605	-36.1787	0.0107757	#N/A	#N/A	#N/A	40325.9	40325.9	#N/A	#N/A	42	1023.87	0.589	11.1374	0.00742	1020.17	0.837	11.0971	0.01011	-27.0585	0.26529	0.0108777	2.966e-06	0.255	0.019	1.52	0.011	1.578	0.001	1035.01	0.59642	1031.27	0.84711
NA2	Syringe1	#N/A	491.352	5.30202	491.07	5.29898	-34.8415	0.0107907	#N/A	#N/A	#N/A	40326.1	40326.1	#N/A	#N/A	33	1023.9	0.394	11.128	0.00584	1023.18	0.406	11.1202	0.00602	-27.9026	0.301962	0.0108682	3.376e-06	0.05	0.002	1.538	0.009	1.578	0	1035.03	0.39984	1034.3	0.41202
NA2	Syringe1	#N/A	491.41	5.30553	491.171	5.30294	-34.3171	0.0107965	#N/A	#N/A	#N/A	40326.8	40326.8	#N/A	#N/A	34	1024.15	0.678	11.132	0.00669	1023.4	0.69	11.1238	0.00681	-27.7914	0.452586	0.0108695	5.06e-06	0.052	0.002	1.564	0.02	1.577	0.001	1035.28	0.68469	1034.52	0.69681
NA2	Syringe1	#N/A	491.041	5.29265	490.783	5.28987	-35.9353	0.0107784	#N/A	#N/A	#N/A	40327	40327	#N/A	#N/A	35	1024.04	0.32	11.1294	0.00455	1023.44	0.334	11.123	0.00468	-27.9094	0.356434	0.0108682	3.985e-06	0.041	0.002	1.537	0.005	1.577	0.001	1035.17	0.32455	1034.57	0.33868
NA2	Syringe1	#N/A	490.598	5.28528	490.252	5.28155	-36.4096	0.0107731	#N/A	#N/A	#N/A	40331.5	40331.5	#N/A	#N/A	29	1023.64	0.371	11.1277	0.00353	1023.08	0.367	11.1216	0.00351	-27.6852	0.274771	0.0108707	3.072e-06	0.039	0.001	1.531	0.006	1.578	0.001	1034.77	0.37453	1034.21	0.37051
NA2	Syringe1	#N/A	490.746	5.28499	490.431	5.2816	-36.7529	0.0107693	#N/A	#N/A	#N/A	40332.7	40332.7	#N/A	#N/A	32	1024.29	0.256	11.1328	0.00404	1023.7	0.268	11.1265	0.00416	-27.8477	0.27665	0.0108689	3.093e-06	0.04	0.002	1.545	0.015	1.578	0.001	1035.42	0.26004	1034.83	0.27216
NA2	Syringe1	#N/A	491.023	5.28759	490.74	5.28454	-36.8238	0.0107685	#N/A	#N/A	#N/A	40332.9	40332.9	#N/A	#N/A	30	1024.34	0.365	11.1351	0.00408	1021.37	0.371	11.1028	0.00406	-27.6993	0.385324	0.0108705	4.308e-06	0.205	0.002	1.529	0.003	1.578	0.001	1035.48	0.36908	1032.47	0.37506
NA2	Syringe1	#N/A	490.595	5.2795	490.33	5.27666	-37.4558	0.0107614	#N/A	#N/A	#N/A	40334.7	40334.7	#N/A	#N/A	30	1023.92	0.265	11.1294	0.00458	1023.51	0.265	11.1249	0.00461	-27.8006	0.290335	0.0108694	3.246e-06	0.029	0.001	1.532	0.007	1.577	0.001	1035.05	0.26958	1034.63	0.26961
NA2	Syringe1	#N/A	490.62	5.27957	490.389	5.27708	-37.493	0.010761	#N/A	#N/A	#N/A	40334.7	40334.7	#N/A	#N/A	32	1024.19	0.394	11.1318	0.00529	1023.77	0.403	11.1272	0.00533	-27.8494	0.331389	0.0108688	3.705e-06	0.029	0.002	1.526	0.005	1.577	0.001	1035.32	0.39929	1034.9	0.40833
NA2	Syringe1	#N/A	490.622	5.28479	490.423	5.28265	-36.5452	0.0107716	#N/A	#N/A	#N/A	40334.8	40334.8	#N/A	#N/A	34	1024.24	0.375	11.1434	0.00357	1022.79	0.451	11.1277	0.00435	-26.8794	0.222536	0.0108797	2.488e-06	0.1	0.009	1.57	0.011	1.576	0.001	1035.38	0.37857	1033.92	0.45535
NA2	Syringe1	#N/A	490.627	5.27859	490.254	5.27457	-37.6871	0.0107589	#N/A	#N/A	#N/A	40337.7	40337.7	#N/A	#N/A	24	1024.16	0.249	11.1299	0.00419	1023.45	0.247	11.1221	0.00432	-27.9869	0.379152	0.0108673	4.239e-06	0.049	0.002	1.552	0.007	1.577	0	1035.29	0.25319	1034.57	0.25132
NA2	Syringe1	#N/A	490.55	5.27966	490.268	5.27663	-37.3396	0.0107627	#N/A	#N/A	#N/A	40339	40339	#N/A	#N/A	33	1023.81	0.312	11.1283	0.00381	1023.18	0.319	11.1214	0.00378	-27.7939	0.288904	0.0108695	3.23e-06	0.044	0.002	1.533	0.016	1.577	0.001	1034.94	0.31581	1034.3	0.32278
NA2	Syringe1	#N/A	491.244	5.28719	491	5.28457	-37.3274	0.0107629	#N/A	#N/A	#N/A	40339.6	40339.6	#N/A	#N/A	32	1023.92	0.383	11.1314	0.00394	1023.09	0.393	11.1224	0.00406	-27.6241	0.393016	0.0108714	4.394e-06	0.057	0.002	1.544	0.012	1.581	0.001	1035.05	0.38694	1034.22	0.39706
NA2	Syringe1	#N/A	490.714	5.27891	490.548	5.27713	-37.7979	0.0107576	#N/A	#N/A	#N/A	40339.8	40339.8	#N/A	#N/A	32	1024.24	0.333	11.1314	0.00436	1023.78	0.335	11.1264	0.00443	-27.9282	0.407506	0.010868	4.556e-06	0.032	0.001	1.541	0.01	1.578	0.001	1035.37	0.33736	1034.9	0.33943
NA2	Syringe1	#N/A	490.989	5.28707	490.708	5.28404	-36.8509	0.0107682	#N/A	#N/A	#N/A	40339.9	40340	#N/A	#N/A	71	1025.43	0.659	11.1475	0.00681	1022.45	0.525	11.1151	0.00523	-27.6553	0.364305	0.010871	4.073e-06	0.205	0.013	1.555	0.015	1.576	0.001	1036.58	0.66581	1033.56	0.53023
NA2	Syringe1	#N/A	490.484	5.27831	490.258	5.27589	-37.4552	0.0107614	#N/A	#N/A	#N/A	40340.1	40340.1	#N/A	#N/A	32	1024.39	0.434	11.1355	0.00426	1023.92	0.443	11.1304	0.0043	-27.7089	0.385145	0.0108704	4.306e-06	0.032	0.002	1.53	0.01	1.578	0.001	1035.53	0.43826	1035.05	0.4473
NA2	Syringe1	#N/A	490.725	5.28315	490.448	5.28017	-37.047	0.010766	#N/A	#N/A	#N/A	40340.7	40340.7	#N/A	#N/A	32	1024.18	0.468	11.1335	0.00499	1023.47	0.494	11.1258	0.0052	-27.6889	0.375932	0.0108706	4.203e-06	0.049	0.003	1.562	0.014	1.578	0.001	1035.32	0.47299	1034.6	0.4992
NA2	Syringe1	#N/A	490.251	5.27944	489.947	5.27618	-36.7917	0.0107689	#N/A	#N/A	#N/A	40346.9	40346.9	#N/A	#N/A	33	1022.21	0.289	11.1135	0.00442	1021.65	0.3	11.1074	0.00453	-27.5674	0.292213	0.010872	3.267e-06	0.039	0.002	1.528	0.004	1.577	0.001	1033.33	0.29342	1032.76	0.30453
NA2	Syringe1	#N/A	490.377	5.27701	490.122	5.27426	-37.4848	0.0107611	#N/A	#N/A	#N/A	40347.8	40347.8	#N/A	#N/A	33	1024.03	0.295	11.1325	0.00383	1023.51	0.314	11.1269	0.004	-27.6258	0.194004	0.0108713	2.169e-06	0.036	0.002	1.531	0.011	1.577	0.001	1035.16	0.29883	1034.64	0.318
NA2	Syringe1	#N/A	490.394	5.28134	490.144	5.27865	-36.727	0.0107696	#N/A	#N/A	#N/A	40347.9	40347.9	#N/A	#N/A	33	1024.13	0.264	11.1364	0.00403	1023.07	0.264	11.1248	0.00411	-27.3928	0.335951	0.0108739	3.756e-06	0.073	0.005	1.594	0.019	1.576	0.001	1035.27	0.26803	1034.2	0.26811
NA2	Syringe1	#N/A	490.29	5.27587	490.043	5.27322	-37.5204	0.0107607	#N/A	#N/A	#N/A	40348.1	40348.1	#N/A	#N/A	32	1024.12	0.381	11.1311	0.00433	1023.55	0.404	11.1249	0.00454	-27.8429	0.355808	0.0108689	3.978e-06	0.039	0.003	1.531	0.012	1.578	0.001	1035.25	0.38533	1034.68	0.40854
NA2	Syringe1	#N/A	490.406	5.27982	490.172	5.2773	-37.0279	0.0107662	#N/A	#N/A	#N/A	40348.8	40348.8	#N/A	#N/A	34	1023.96	0.371	11.1307	0.0043	1023.45	0.374	11.1252	0.00447	-27.7161	0.378258	0.0108703	4.229e-06	0.035	0.002	1.527	0.01	1.578	0.001	1035.09	0.3753	1034.57	0.37847
NA2	Syringe1	#N/A	490.399	5.27813	490.176	5.27574	-37.3212	0.0107629	#N/A	#N/A	#N/A	40349	40349	#N/A	#N/A	40	1024.17	0.331	11.1328	0.00279	1023.65	0.341	11.1271	0.00289	-27.7426	0.26699	0.01087	2.985e-06	0.036	0.003	1.528	0.008	1.578	0.001	1035.3	0.33379	1034.78	0.34389
NA2	Syringe1	#N/A	491.026	5.2957	490.829	5.29358	-35.3514	0.010785	#N/A	#N/A	#N/A	40358.8	40358.8	#N/A	#N/A	54	1024.17	0.349	11.1486	0.00535	1023.66	0.378	11.1431	0.00563	-26.3565	0.332105	0.0108855	3.713e-06	0.035	0.003	1.554	0.013	1.578	0.001	1035.32	0.35435	1034.8	0.38363
NA2	Syringe1	#N/A	490.486	5.2751	490.312	5.27322	-38.0467	0.0107548	#N/A	#N/A	#N/A	40360.7	40360.7	#N/A	#N/A	36	1023.08	0.341	11.1191	0.00573	1022.65	0.351	11.1144	0.00582	-27.9014	0.333983	0.0108683	3.734e-06	0.03	0.001	1.522	0.009	1.578	0.002	1034.2	0.34673	1033.77	0.35682
NA2	Syringe1	#N/A	490.415	5.27824	490.149	5.27538	-37.3337	0.0107628	#N/A	#N/A	#N/A	40361	40361	#N/A	#N/A	38	1023.78	0.299	11.1286	0.00409	1023.29	0.294	11.1234	0.00415	-27.7293	0.338366	0.0108702	3.783e-06	0.034	0.002	1.534	0.013	1.577	0.001	1034.9	0.30309	1034.41	0.29815
NA2	Syringe1	#N/A	490.787	5.28322	490.476	5.27987	-37.1558	0.0107648	#N/A	#N/A	#N/A	40361.6	40361.6	#N/A	#N/A	70	1024.16	0.361	11.137	0.00553	1021.59	0.329	11.1091	0.00503	-27.3615	0.309833	0.0108743	3.464e-06	0.177	0.006	1.577	0.014	1.575	0.001	1035.29	0.36653	1032.7	0.33403
NA2	Syringe1	#N/A	490.518	5.27615	490.28	5.27359	-37.9169	0.0107563	#N/A	#N/A	#N/A	40361.8	40361.8	#N/A	#N/A	40	1024.23	0.467	11.1323	0.00481	1023.84	0.474	11.128	0.00491	-27.8467	0.351962	0.0108689	3.935e-06	0.027	0.001	1.527	0.013	1.577	0.001	1035.37	0.47181	1034.97	0.47891
NA2	Syringe1	#N/A	490.646	5.27979	490.356	5.27666	-37.5053	0.0107609	#N/A	#N/A	#N/A	40362.9	40362.9	#N/A	#N/A	43	1024.23	0.286	11.1307	0.00431	1023.64	0.301	11.1243	0.00457	-27.9787	0.280675	0.0108674	3.138e-06	0.041	0.002	1.544	0.013	1.578	0.001	1035.36	0.29031	1034.77	0.30557
NA2	Syringe1	#N/A	490.816	5.28787	490.612	5.28567	-36.3653	0.0107736	#N/A	#N/A	#N/A	40367.6	40367.6	#N/A	#N/A	32	1023.7	0.294	11.1379	0.00392	1023.13	0.308	11.1318	0.00404	-26.8415	0.211445	0.0108801	2.364e-06	0.039	0.001	1.561	0.011	1.577	0.001	1034.84	0.29792	1034.26	0.31204
NA2	Syringe1	#N/A	490.554	5.28103	490.186	5.27707	-37.0968	0.0107655	#N/A	#N/A	#N/A	40367.8	40367.8	#N/A	#N/A	45	1024.53	0.513	11.1396	0.00568	1023.57	0.615	11.1293	0.00662	-27.4789	0.363947	0.010873	4.069e-06	0.066	0.01	1.581	0.009	1.577	0.002	1035.66	0.51868	1034.7	0.62162
NA2	Syringe1	#N/A	490.314	5.27501	489.854	5.27005	-37.7251	0.0107584	#N/A	#N/A	#N/A	40375.8	40375.8	#N/A	#N/A	43	1024.18	0.325	11.1355	0.00562	1023.4	0.347	11.1271	0.00573	-27.508	0.253484	0.0108727	2.834e-06	0.054	0.003	1.543	0.014	1.577	0.001	1035.31	0.33062	1034.53	0.35273
NA2	Syringe1	#N/A	490.312	5.27803	489.871	5.27328	-37.1693	0.0107646	#N/A	#N/A	#N/A	40375.9	40375.9	#N/A	#N/A	41	1024.09	0.416	11.1328	0.00463	1023.37	0.441	11.1249	0.00492	-27.6665	0.313143	0.0108709	3.501e-06	0.05	0.003	1.563	0.013	1.577	0.002	1035.22	0.42063	1034.49	0.44592
NA2	Syringe1	#N/A	490.863	5.28315	490.524	5.27951	-37.3173	0.010763	#N/A	#N/A	#N/A	40376.7	40376.7	#N/A	#N/A	42	1024.2	0.294	11.1369	0.00518	1022.43	0.303	11.1177	0.00522	-27.4114	0.283537	0.0108737	3.17e-06	0.122	0.002	1.61	0.019	1.575	0.001	1035.34	0.29918	1033.55	0.30822
NA2	Syringe1	#N/A	490.717	5.2808	490.493	5.2784	-37.4584	0.0107614	#N/A	#N/A	#N/A	40376.9	40376.9	#N/A	#N/A	51	1024.11	0.463	11.1346	0.0053	1023.5	0.466	11.128	0.00532	-27.5245	0.387113	0.0108725	4.328e-06	0.042	0.002	1.549	0.012	1.577	0.002	1035.24	0.4683	1034.63	0.47132
NA2	Syringe1	#N/A	490.672	5.28098	490.273	5.27668	-37.3392	0.0107627	#N/A	#N/A	#N/A	40377	40377	#N/A	#N/A	43	1022.88	0.463	11.119	0.00453	1022.14	0.485	11.1111	0.00474	-27.7135	0.4101	0.0108704	4.585e-06	0.051	0.003	1.568	0.011	1.577	0.001	1033.99	0.46753	1033.25	0.48974
NA2	Syringe1	#N/A	490.894	5.28598	490.515	5.2819	-36.8628	0.0107681	#N/A	#N/A	#N/A	40377.7	40377.7	#N/A	#N/A	46	1024.15	0.501	11.136	0.00451	1022.2	0.498	11.1148	0.0046	-27.4437	0.316989	0.0108734	3.544e-06	0.134	0.002	1.549	0.012	1.576	0.001	1035.29	0.50551	1033.32	0.5026
NA2	Syringe1	#N/A	490.52	5.27757	490.161	5.2737	-37.6619	0.0107591	#N/A	#N/A	#N/A	40377.9	40377.9	#N/A	#N/A	33	1023.98	0.279	11.1314	0.00401	1023.31	0.291	11.1241	0.00408	-27.6801	0.342749	0.0108707	3.832e-06	0.047	0.002	1.563	0.015	1.577	0.001	1035.11	0.28301	1034.43	0.29508
NA2	Syringe1	#N/A	490.888	5.28346	490.549	5.27982	-37.3101	0.0107631	#N/A	#N/A	#N/A	40378	40378.1	#N/A	#N/A	25	1024.37	0.275	11.1363	0.00284	1023.64	0.287	11.1284	0.00286	-27.6232	0.322266	0.0108714	3.603e-06	0.05	0.001	1.566	0.017	1.577	0	1035.5	0.27784	1034.77	0.28986
NA2	Syringe1	#N/A	490.595	5.28051	490.257	5.27687	-37.2731	0.0107635	#N/A	#N/A	#N/A	40378.1	40378.1	#N/A	#N/A	32	1024.18	0.373	11.1333	0.00488	1023.47	0.382	11.1256	0.00492	-27.7045	0.450171	0.0108705	5.033e-06	0.049	0.002	1.553	0.016	1.577	0	1035.31	0.37788	1034.6	0.38692
NA2	Syringe1	#N/A	490.65	5.28081	490.336	5.27742	-37.3268	0.0107629	#N/A	#N/A	#N/A	40378.8	40378.8	#N/A	#N/A	41	1023.76	0.312	11.1313	0.00402	1022.79	0.333	11.1208	0.00417	-27.4765	0.306882	0.010873	3.431e-06	0.067	0.002	1.553	0.008	1.577	0	1034.89	0.31602	1033.91	0.33717
NA2	Syringe1	#N/A	490.665	5.28304	490.206	5.2781	-36.9497	0.0107671	#N/A	#N/A	#N/A	40387.6	40387.6	#N/A	#N/A	38	1024.44	0.366	11.1339	0.00396	1023.83	0.379	11.1273	0.00405	-27.894	0.32325	0.0108683	3.614e-06	0.042	0.003	1.545	0.013	1.577	0.001	1035.57	0.36996	1034.96	0.38305
NA2	Syringe1	#N/A	491.085	5.28403	490.677	5.27964	-37.5913	0.0107599	#N/A	#N/A	#N/A	40387.7	40387.7	#N/A	#N/A	40	1024.82	0.349	11.1378	0.00494	1024.01	0.353	11.129	0.00507	-27.922	0.322177	0.010868	3.602e-06	0.056	0.002	1.587	0.02	1.577	0.001	1035.96	0.35394	1035.14	0.35807
NA2	Syringe1	#N/A	490.697	5.27999	490.463	5.27748	-37.567	0.0107602	#N/A	#N/A	#N/A	40388.6	40388.6	#N/A	#N/A	35	1024.8	0.369	11.1387	0.0056	1024.37	0.357	11.134	0.00563	-27.8228	0.412783	0.0108691	4.615e-06	0.029	0.002	1.57	0.018	1.577	0.001	1035.94	0.3746	1035.51	0.36263
NA2	Syringe1	#N/A	490.937	5.28382	490.565	5.27982	-37.3402	0.0107627	#N/A	#N/A	#N/A	40388.7	40388.7	#N/A	#N/A	31	1024.9	0.472	11.1418	0.00488	1023.78	0.462	11.1297	0.00516	-27.6415	0.502764	0.0108712	5.621e-06	0.077	0.003	1.526	0.009	1.577	0.001	1036.04	0.47688	1034.91	0.46716
NA2	Syringe1	#N/A	490.583	5.28488	490.226	5.28103	-36.4531	0.0107726	#N/A	#N/A	#N/A	40390.5	40390.5	#N/A	#N/A	29	1024.41	0.332	11.1377	0.00504	1023.39	0.349	11.1267	0.00524	-27.5378	0.35223	0.0108723	3.938e-06	0.07	0.002	1.533	0.004	1.578	0.002	1035.55	0.33704	1034.52	0.35424
NA2	Syringe1	#N/A	490.158	5.28165	489.712	5.27685	-36.2061	0.0107754	#N/A	#N/A	#N/A	40394.5	40394.5	#N/A	#N/A	31	1022.46	0.34	11.1166	0.00469	1021.67	0.348	11.108	0.00479	-27.5284	0.263323	0.0108724	2.944e-06	0.055	0.002	1.54	0.015	1.575	0.002	1033.57	0.34469	1032.77	0.35279
NA2	Syringe1	#N/A	490.208	5.27892	489.848	5.27504	-36.803	0.0107687	#N/A	#N/A	#N/A	40395.5	40395.5	#N/A	#N/A	24	1023.72	0.346	11.1339	0.00419	1022.9	0.362	11.1251	0.00429	-27.2107	0.322982	0.010876	3.611e-06	0.056	0.001	1.528	0.011	1.577	0.002	1034.85	0.35019	1034.03	0.36629
NA2	Syringe1	#N/A	490.214	5.27989	489.743	5.27482	-36.6369	0.0107706	#N/A	#N/A	#N/A	40396.5	40396.5	#N/A	#N/A	35	1024.02	0.353	11.1319	0.00509	1023.15	0.366	11.1226	0.00522	-27.6681	0.455627	0.0108709	5.094e-06	0.06	0.002	1.557	0.025	1.579	0.002	1035.15	0.35809	1034.28	0.37122
NA2	Syringe1	#N/A	490.686	5.28343	490.318	5.27947	-36.919	0.0107674	#N/A	#N/A	#N/A	40397.5	40397.5	#N/A	#N/A	32	1025.1	0.355	11.1526	0.0042	1024.38	0.368	11.1448	0.00436	-26.8875	0.333804	0.0108796	3.732e-06	0.05	0.002	1.57	0.021	1.577	0.001	1036.25	0.3592	1035.52	0.37236
NA2	Syringe1	#N/A	489.187	5.27351	488.553	5.26667	-35.7826	0.0107801	#N/A	#N/A	#N/A	40403.5	40403.5	#N/A	#N/A	31	1024.38	0.277	11.1429	0.00427	1023.47	0.292	11.1329	0.00435	-27.0587	0.277008	0.0108777	3.097e-06	0.063	0.001	1.565	0.014	1.577	0.001	1035.53	0.28127	1034.6	0.29635
NA2	Syringe1	#N/A	489.66	5.27868	489.027	5.27185	-35.7696	0.0107803	#N/A	#N/A	#N/A	40403.6	40403.6	#N/A	#N/A	29	1024.66	0.211	11.1478	0.00447	1022.37	0.516	11.1228	0.00649	-26.8971	0.373339	0.0108795	4.174e-06	0.159	0.031	1.545	0.01	1.575	0.001	1035.81	0.21547	1033.49	0.52249
NA2	Syringe1	#N/A	489.664	5.27719	489.093	5.27104	-36.048	0.0107772	#N/A	#N/A	#N/A	40407.6	40407.6	#N/A	#N/A	33	1023.49	0.557	11.1331	0.00426	1022.54	0.582	11.1228	0.0045	-27.065	0.325486	0.0108776	3.639e-06	0.065	0.003	1.539	0.01	1.577	0.001	1034.62	0.56126	1033.66	0.5865
NA2	Syringe1	#N/A	490.284	5.28283	489.73	5.27686	-36.2398	0.010775	#N/A	#N/A	#N/A	40408.6	40408.6	#N/A	#N/A	31	1024.6	0.388	11.1486	0.00457	1022.24	0.46	11.123	0.00659	-26.7593	0.424411	0.010881	4.745e-06	0.163	0.019	1.524	0.012	1.576	0.002	1035.74	0.39257	1033.36	0.46659
NA2	Syringe1	#N/A	489.865	5.27453	489.34	5.26888	-36.9308	0.0107673	#N/A	#N/A	#N/A	40409.5	40409.5	#N/A	#N/A	28	1024.26	0.386	11.1348	0.00487	1023.54	0.401	11.1269	0.00498	-27.6536	0.279959	0.010871	3.13e-06	0.05	0.002	1.566	0.011	1.58	0.001	1035.4	0.39087	1034.66	0.40598
NA2	Syringe1	#N/A	488.968	5.27194	488.446	5.26631	-35.6367	0.0107818	#N/A	#N/A	#N/A	40415.5	40415.5	#N/A	#N/A	31	1023.71	0.485	11.1335	0.00491	1022.87	0.497	11.1244	0.00501	-27.2385	0.412604	0.0108757	4.613e-06	0.058	0.002	1.546	0.01	1.58	0.001	1034.84	0.48991	1034	0.50201
NA2	Syringe1	#N/A	489.356	5.27501	488.771	5.26871	-35.8389	0.0107795	#N/A	#N/A	#N/A	40416.5	40416.5	#N/A	#N/A	29	1024.61	0.447	11.1452	0.00533	1023.89	0.455	11.1373	0.00542	-27.0827	0.296149	0.0108774	3.311e-06	0.05	0.002	1.562	0.015	1.578	0.001	1035.76	0.45233	1035.03	0.46042
NA2	Syringe1	#N/A	489.747	5.2749	489.197	5.26897	-36.6318	0.0107706	#N/A	#N/A	#N/A	40417.5	40417.5	#N/A	#N/A	30	1024.27	0.557	11.135	0.00468	1023.49	0.56	11.1265	0.00472	-27.6433	0.495251	0.0108711	5.537e-06	0.054	0.002	1.566	0.018	1.577	0.002	1035.41	0.56168	1034.61	0.56472
NA2	Syringe1	#N/A	490.221	5.27762	489.768	5.27274	-37.0665	0.0107658	#N/A	#N/A	#N/A	40418.6	40418.6	#N/A	#N/A	25	1023.92	0.354	11.1327	0.00367	1023	0.357	11.1226	0.00371	-27.5183	0.414036	0.0108725	4.629e-06	0.064	0.001	1.555	0.006	1.578	0.001	1035.06	0.35767	1034.12	0.36071
NA2	Syringe1	#N/A	489.742	5.27803	489.164	5.2718	-36.0483	0.0107772	#N/A	#N/A	#N/A	40424.5	40424.5	#N/A	#N/A	31	1024.33	0.54	11.1399	0.00525	1023.57	0.555	11.1316	0.00538	-27.2719	0.413052	0.0108753	4.618e-06	0.053	0.003	1.568	0.015	1.577	0.002	1035.47	0.54525	1034.7	0.56038
NA2	Syringe1	#N/A	490.171	5.28048	489.693	5.27533	-36.4446	0.0107727	#N/A	#N/A	#N/A	40428.6	40428.6	#N/A	#N/A	28	1023.75	0.378	11.1352	0.0057	1022.91	0.374	11.1261	0.00573	-27.1318	0.261713	0.0108769	2.926e-06	0.058	0.002	1.577	0.019	1.578	0.001	1034.88	0.3837	1034.04	0.37973
NA2	Syringe1	#N/A	490.043	5.27858	489.55	5.27327	-36.5409	0.0107717	#N/A	#N/A	#N/A	40430.5	40430.5	#N/A	#N/A	32	1024.06	0.294	11.1353	0.00433	1023.44	0.312	11.1285	0.00441	-27.4146	0.311354	0.0108737	3.481e-06	0.043	0.002	1.571	0.011	1.578	0.001	1035.19	0.29833	1034.56	0.31641
NA2	Syringe1	#N/A	490.301	5.28129	489.812	5.27602	-36.5543	0.0107715	#N/A	#N/A	#N/A	40430.7	40430.7	#N/A	#N/A	26	1024.54	0.298	11.1426	0.00459	1022.97	0.362	11.1255	0.00531	-27.2369	0.398293	0.0108757	4.453e-06	0.108	0.016	1.604	0.009	1.576	0.001	1035.68	0.30259	1034.09	0.36731
NA2	Syringe1	#N/A	490.239	5.28417	489.735	5.27873	-35.9077	0.0107787	#N/A	#N/A	#N/A	40435.5	40435.5	#N/A	#N/A	26	1023.85	0.32	11.1365	0.00519	1023.17	0.322	11.1291	0.0053	-27.1092	0.40044	0.0108771	4.477e-06	0.047	0.002	1.551	0.007	1.577	0.001	1034.99	0.32519	1034.3	0.3273
NA2	Syringe1	#N/A	490.442	5.28473	489.934	5.27925	-36.2035	0.0107754	#N/A	#N/A	#N/A	40436.5	40436.5	#N/A	#N/A	28	1024.14	0.292	11.141	0.00381	1023.43	0.295	11.1333	0.00384	-26.9949	0.228618	0.0108784	2.556e-06	0.049	0.002	1.554	0.009	1.577	0.001	1035.28	0.29581	1034.57	0.29884
NA2	Syringe1	#N/A	490.689	5.2836	490.147	5.27777	-36.8927	0.0107677	#N/A	#N/A	#N/A	40437.5	40437.5	#N/A	#N/A	22	1024.66	0.369	11.1397	0.00397	1024.06	0.368	11.1333	0.00405	-27.5967	0.448024	0.0108717	5.009e-06	0.041	0.001	1.544	0.005	1.578	0.001	1035.8	0.37297	1035.2	0.37205
NA2	Syringe1	#N/A	491.177	5.28964	490.738	5.28491	-36.7515	0.0107693	#N/A	#N/A	#N/A	40438.5	40438.5	#N/A	#N/A	35	1024.72	0.314	11.146	0.00382	1024.05	0.311	11.1386	0.00387	-27.1108	0.29436	0.0108771	3.291e-06	0.047	0.002	1.553	0.017	1.577	0.001	1035.87	0.31782	1035.18	0.31487
NA2	Syringe1	#N/A	490.465	5.28485	489.967	5.27948	-36.2263	0.0107752	#N/A	#N/A	#N/A	40443.5	40443.5	#N/A	#N/A	26	1023.56	0.365	11.1336	0.00441	1022.89	0.362	11.1264	0.00442	-27.0901	0.441048	0.0108773	4.931e-06	0.046	0.003	1.564	0.011	1.578	0.001	1034.7	0.36941	1034.02	0.36642
NA2	Syringe1	#N/A	490.421	5.28018	489.941	5.27502	-36.9916	0.0107666	#N/A	#N/A	#N/A	40445.5	40445.5	#N/A	#N/A	27	1024.57	0.382	11.1393	0.00497	1024.02	0.389	11.1334	0.00498	-27.5462	0.329511	0.0108722	3.684e-06	0.038	0.002	1.576	0.011	1.578	0.001	1035.7	0.38697	1035.15	0.39398
NA2	Syringe1	#N/A	490.628	5.28237	490.113	5.27682	-36.9988	0.0107665	#N/A	#N/A	#N/A	40445.6	40445.6	#N/A	#N/A	36	1025.23	0.646	11.1478	0.0054	1021.16	1.424	11.1035	0.01675	-27.4369	0.345522	0.0108735	3.863e-06	0.28	0.111	1.593	0.011	1.574	0.003	1036.38	0.6514	1032.26	1.44075
NA2	Syringe1	#N/A	490.586	5.28455	490.074	5.27904	-36.518	0.0107719	#N/A	#N/A	#N/A	40450.5	40450.5	#N/A	#N/A	26	1024.07	0.2	11.1396	0.00374	1023.41	0.206	11.1324	0.00378	-27.0549	0.347489	0.0108777	3.885e-06	0.046	0.002	1.577	0.023	1.577	0.001	1035.21	0.20374	1034.54	0.20978
NA2	Syringe1	#N/A	490.551	5.28423	490	5.27829	-36.5089	0.010772	#N/A	#N/A	#N/A	40450.7	40450.7	#N/A	#N/A	30	1024.39	0.294	11.1418	0.00387	1023.36	0.33	11.1307	0.00402	-27.1575	0.311354	0.0108766	3.481e-06	0.071	0.004	1.614	0.011	1.577	0.001	1035.53	0.29787	1034.49	0.33402
NA2	Syringe1	#N/A	490.429	5.2845	489.949	5.27933	-36.2183	0.0107753	#N/A	#N/A	#N/A	40457.5	40457.5	#N/A	#N/A	28	1024.29	0.287	11.1427	0.00416	1023.72	0.295	11.1364	0.00427	-26.99	0.302052	0.0108784	3.377e-06	0.04	0.002	1.552	0.007	1.578	0.001	1035.43	0.29116	1034.85	0.29927
NA2	Syringe1	#N/A	490.869	5.28824	490.425	5.28346	-36.4018	0.0107732	#N/A	#N/A	#N/A	40457.6	40457.6	#N/A	#N/A	24	1024.42	0.17	11.1409	0.00277	1023.81	0.167	11.1343	0.00275	-27.2706	0.232554	0.0108753	2.6e-06	0.042	0.002	1.563	0.005	1.578	0	1035.56	0.17277	1034.95	0.16975
NA2	Syringe1	#N/A	490.7	5.28596	490.215	5.28073	-36.4858	0.0107723	#N/A	#N/A	#N/A	40458.5	40458.5	#N/A	#N/A	25	1024.42	0.252	11.1412	0.00469	1023.87	0.261	11.1352	0.00476	-27.245	0.355629	0.0108756	3.976e-06	0.038	0.001	1.536	0.009	1.577	0.001	1035.57	0.25669	1035	0.26576
NA2	Syringe1	#N/A	491.197	5.29004	490.74	5.28512	-36.7169	0.0107697	#N/A	#N/A	#N/A	40459.5	40459.5	#N/A	#N/A	27	1024.73	0.231	11.1475	0.00353	1024.14	0.242	11.1411	0.00355	-26.9801	0.260103	0.0108786	2.908e-06	0.041	0.002	1.565	0.008	1.578	0	1035.87	0.23453	1035.28	0.24555
NA2	Syringe1	#N/A	490.867	5.28867	490.317	5.28274	-36.3195	0.0107741	#N/A	#N/A	#N/A	40463.5	40463.5	#N/A	#N/A	26	1024.32	0.264	11.1371	0.00367	1023.69	0.269	11.1302	0.00383	-27.5036	0.348026	0.0108727	3.891e-06	0.044	0.002	1.585	0.015	1.577	0.001	1035.46	0.26767	1034.82	0.27283
NA2	Syringe1	#N/A	491.275	5.29456	490.795	5.28939	-36.0468	0.0107772	#N/A	#N/A	#N/A	40464.5	40464.5	#N/A	#N/A	34	1025.14	0.392	11.1527	0.00413	1024.05	0.448	11.1409	0.00475	-26.9202	0.334073	0.0108792	3.735e-06	0.075	0.006	1.603	0.02	1.577	0.001	1036.29	0.39613	1035.19	0.45275
NA2	Syringe1	#N/A	490.725	5.28748	490.215	5.28198	-36.257	0.0107748	#N/A	#N/A	#N/A	40465.5	40465.5	#N/A	#N/A	23	1024.43	0.221	11.1389	0.00393	1023.47	0.269	11.1285	0.00412	-27.4494	0.319941	0.0108733	3.577e-06	0.067	0.005	1.584	0.016	1.577	0.001	1035.57	0.22493	1034.6	0.27312
NA2	Syringe1	#N/A	504.148	5.30978	502.75	5.29506	-57.96	0.0105322	#N/A	#N/A	#N/A	40471.5	40471.5	#N/A	#N/A	28	1024.63	0.299	11.1475	0.00399	1023.97	0.297	11.1404	0.00412	-26.8852	0.339171	0.0108796	3.792e-06	0.045	0.003	1.552	0.008	1.577	0.001	1035.77	0.30299	1035.11	0.30112
NA2	Syringe1	#N/A	504.578	5.29783	503.039	5.28166	-60.8826	0.0104995	#N/A	#N/A	#N/A	40471.7	40471.7	#N/A	#N/A	37	1025.58	0.905	11.1564	0.00829	1020.79	2.36	11.1043	0.02578	-27.0195	0.342123	0.0108781	3.825e-06	0.328	0.192	1.572	0.005	1.573	0.004	1036.74	0.91329	1031.89	2.38578
NA2	Syringe1	#N/A	494.96	5.22134	493.826	5.20938	-56.4558	0.010549	#N/A	#N/A	#N/A	40485.5	40485.5	#N/A	#N/A	28	1024.44	0.291	11.1478	0.00347	1023.8	0.29	11.1408	0.00362	-26.6864	0.34409	0.0108818	3.847e-06	0.044	0.002	1.575	0.009	1.576	0.001	1035.59	0.29447	1034.94	0.29362
NA2	Syringe1	#N/A	495.189	5.22311	494.035	5.21094	-56.5713	0.0105477	#N/A	#N/A	#N/A	40485.6	40485.6	#N/A	#N/A	29	1025.2	0.31	11.1546	0.00474	1022.68	0.555	11.1272	0.0089	-26.8076	0.375754	0.0108805	4.201e-06	0.173	0.037	1.593	0.006	1.575	0.001	1036.35	0.31474	1033.81	0.5639
NA2	Syringe1	#N/A	492.826	5.23415	491.873	5.22403	-50.045	0.0106207	#N/A	#N/A	#N/A	40486.5	40486.5	#N/A	#N/A	24	1024.25	0.23	11.1426	0.00481	1023.59	0.239	11.1355	0.00494	-26.955	0.279959	0.0108788	3.13e-06	0.045	0.002	1.565	0.013	1.577	0	1035.39	0.23481	1034.73	0.24394
NA2	Syringe1	#N/A	492.293	5.24501	491.375	5.23523	-47.0433	0.0106542	#N/A	#N/A	#N/A	40499.5	40499.5	#N/A	#N/A	30	1024.32	0.349	11.1385	0.0042	1023.78	0.365	11.1326	0.00436	-27.3828	0.301694	0.0108741	3.373e-06	0.037	0.002	1.524	0.008	1.577	0.001	1035.46	0.3532	1034.91	0.36936
NA2	Syringe1	#N/A	492.441	5.24704	491.56	5.23766	-46.9604	0.0106552	#N/A	#N/A	#N/A	40500.5	40500.5	#N/A	#N/A	27	1024.95	0.2	11.1488	0.00478	1024.28	0.213	11.1414	0.00491	-27.0887	0.189889	0.0108773	2.123e-06	0.047	0.002	1.563	0.012	1.576	0.001	1036.1	0.20478	1035.42	0.21791
NA2	Syringe1	#N/A	491.196	5.26078	490.493	5.25325	-42.0441	0.0107101	#N/A	#N/A	#N/A	40506.5	40506.5	#N/A	#N/A	29	1024.22	0.288	11.1355	0.00349	1023.64	0.294	11.1292	0.00362	-27.5494	0.327096	0.0108722	3.657e-06	0.04	0.002	1.546	0.007	1.577	0.001	1035.35	0.29149	1034.77	0.29762
