# Supplementary material for: System for δ 13 C-CO 2 and x CO 2 analysis of discrete gas samples by cavity ring-down spectroscopy
Source: Copernicus journal article supplement (doi:10.5194/amt-2017-57), 2017-04-20
Supplement: Supplementary file 3 [file Syringe_bias_corr.xlsx]

## Sheet: Syringe correction template
Worksheet to correct syringe samples for memory effect errors (Picarro G2131-i)
Specify the correction constants KC12, KC13 for specific setup & syringe. Insert raw data on left and corrected data is automatically generated on right.
Note that this sheet only corrects syringe memory effects, does not calibrate data against gravimetric standards
Note also that the raw reported data of the G2131-I are inconsistent between 12CO2, 13CO2, DELTA, AND RATIO
Ensure that correct data are used and adjusted.
Coefficents for syringe correction					KC12	KC13		VPDB
					1.00341	1.0044		0.0111802
Input data (coordinator output)																																						Corrected data
Sample number	Sample Code	Vessel Code	Measurement Code	12CO2 Dry Baseline	13CO2 Dry Baseline	12CO2 Baseline	13CO2 Baseline	Delta Baseline	Ratio Baseline	H2O Baseline	CH4 Baseline	CH4 HP Baseline	Time triggered	Time de-triggered	Time elapsed (seconds)	Data elapsed	Measurement interval (datapoints)	Mean 12CO2 Dry	Std 12CO2 Dry	Mean 13CO2 Dry	Std 13CO2 Dry	Mean 12CO2	Std 12CO2	Mean 13CO2	Std 13CO2	Mean Delta	Std Delta	Mean Ratio	Std Ratio	Mean H2O	Std H2O	Mean CH4	Std CH4	Mean CH4 HP	Std CH4 HP			Sample number	Sample Code	Vessel Code	Measurement Code	12CO2 Dry Baseline	13CO2 Dry Baseline	12CO2 Baseline	13CO2 Baseline	Delta Baseline	Ratio Baseline	H2O Baseline	CH4 Baseline
																																						#N/A	0	0	0	0	0	0	0	0	0	0	0
	HE1	Syringe1	1	488.733	5.34503	488.236	5.3396	-37.146	0.0108538	0.072	-0.019	0.015	2015-08-20 20:13:17	2015-08-20 20:16:16	180.5	138	43	2016.98	0.696	25.7117	0.00553	2016.13	0.692	25.7009	0.00567	122.338	0.367	0.0126636	4.159e-06	0.03	0.001	0.352	0.014	0.398	0.001			#N/A	HE1	Syringe1	1	488.733	5.34503	488.236	5.3396	-37.146	0.0108538	0.072	-0.019
																																						#N/A	0	0	0	0	0	0	0	0	0	0	0
																																						#N/A	0	0	0	0	0	0	0	0	0	0	0
																																						#N/A	0	0	0	0	0	0	0	0	0	0	0
																																						#N/A	0	0	0	0	0	0	0	0	0	0	0
																																						#N/A	0	0	0	0	0	0	0	0	0	0	0
																																						#N/A	0	0	0	0	0	0	0	0	0	0	0
																																						#N/A	0	0	0	0	0	0	0	0	0	0	0
																																						#N/A	0	0	0	0	0	0	0	0	0	0	0
																																						#N/A	0	0	0	0	0	0	0	0	0	0	0
																																						#N/A	0	0	0	0	0	0	0	0	0	0	0
																																						#N/A	0	0	0	0	0	0	0	0	0	0	0
																																						#N/A	0	0	0	0	0	0	0	0	0	0	0
																																						#N/A	0	0	0	0	0	0	0	0	0	0	0
																																						#N/A	0	0	0	0	0	0	0	0	0	0	0
																																						#N/A	0	0	0	0	0	0	0	0	0	0	0
																																						#N/A	0	0	0	0	0	0	0	0	0	0	0
																																						#N/A	0	0	0	0	0	0	0	0	0	0	0
																																						#N/A	0	0	0	0	0	0	0	0	0	0	0
																																						#N/A	0	0	0	0	0	0	0	0	0	0	0
																																						#N/A	0	0	0	0	0	0	0	0	0	0	0
																																						#N/A	0	0	0	0	0	0	0	0	0	0	0
																																						#N/A	0	0	0	0	0	0	0	0	0	0	0
																																						#N/A	0	0	0	0	0	0	0	0	0	0	0
																																						#N/A	0	0	0	0	0	0	0	0	0	0	0
																																						#N/A	0	0	0	0	0	0	0	0	0	0	0
																																						#N/A	0	0	0	0	0	0	0	0	0	0	0
																																						#N/A	0	0	0	0	0	0	0	0	0	0	0
																																						#N/A	0	0	0	0	0	0	0	0	0	0	0
																																						#N/A	0	0	0	0	0	0	0	0	0	0	0
																																						#N/A	0	0	0	0	0	0	0	0	0	0	0
																																						#N/A	0	0	0	0	0	0	0	0	0	0	0
																																						#N/A	0	0	0	0	0	0	0	0	0	0	0
																																						#N/A	0	0	0	0	0	0	0	0	0	0	0
																																						#N/A	0	0	0	0	0	0	0	0	0	0	0
																																						#N/A	0	0	0	0	0	0	0	0	0	0	0
																																						#N/A	0	0	0	0	0	0	0	0	0	0	0
																																						#N/A	0	0	0	0	0	0	0	0	0	0	0
																																						#N/A	0	0	0	0	0	0	0	0	0	0	0
[truncated: 28 more columns]
